# Supplementary material
Source: PubMed Central journal article supplement (PMC6606466)
Supplement: rstb20180549supp1.pdf [file rstb20180549supp1.pdf]

# Supplementary online material

for

## Thermal performance across levels of biological organization

Enrico L. Rezende and Francisco Bozinovic

### Contents

|                                                        |    |
|--------------------------------------------------------|----|
| Fig S1 .....                                           | 2  |
| Fig S2 .....                                           | 3  |
| Fig S3 .....                                           | 4  |
| Appendix A                                             |    |
| Table A1. Photosynthesis raw data .....                | 5  |
| References.....                                        | 8  |
| Table A2. Running speed raw data .....                 | 9  |
| References.....                                        | 13 |
| Table A3. Fitness raw data .....                       | 15 |
| References.....                                        | 19 |
| Appendix B                                             |    |
| R script .....                                         | 21 |
| Appendix C                                             |    |
| Table C1. Fitted parameters for the full dataset ..... | 24 |

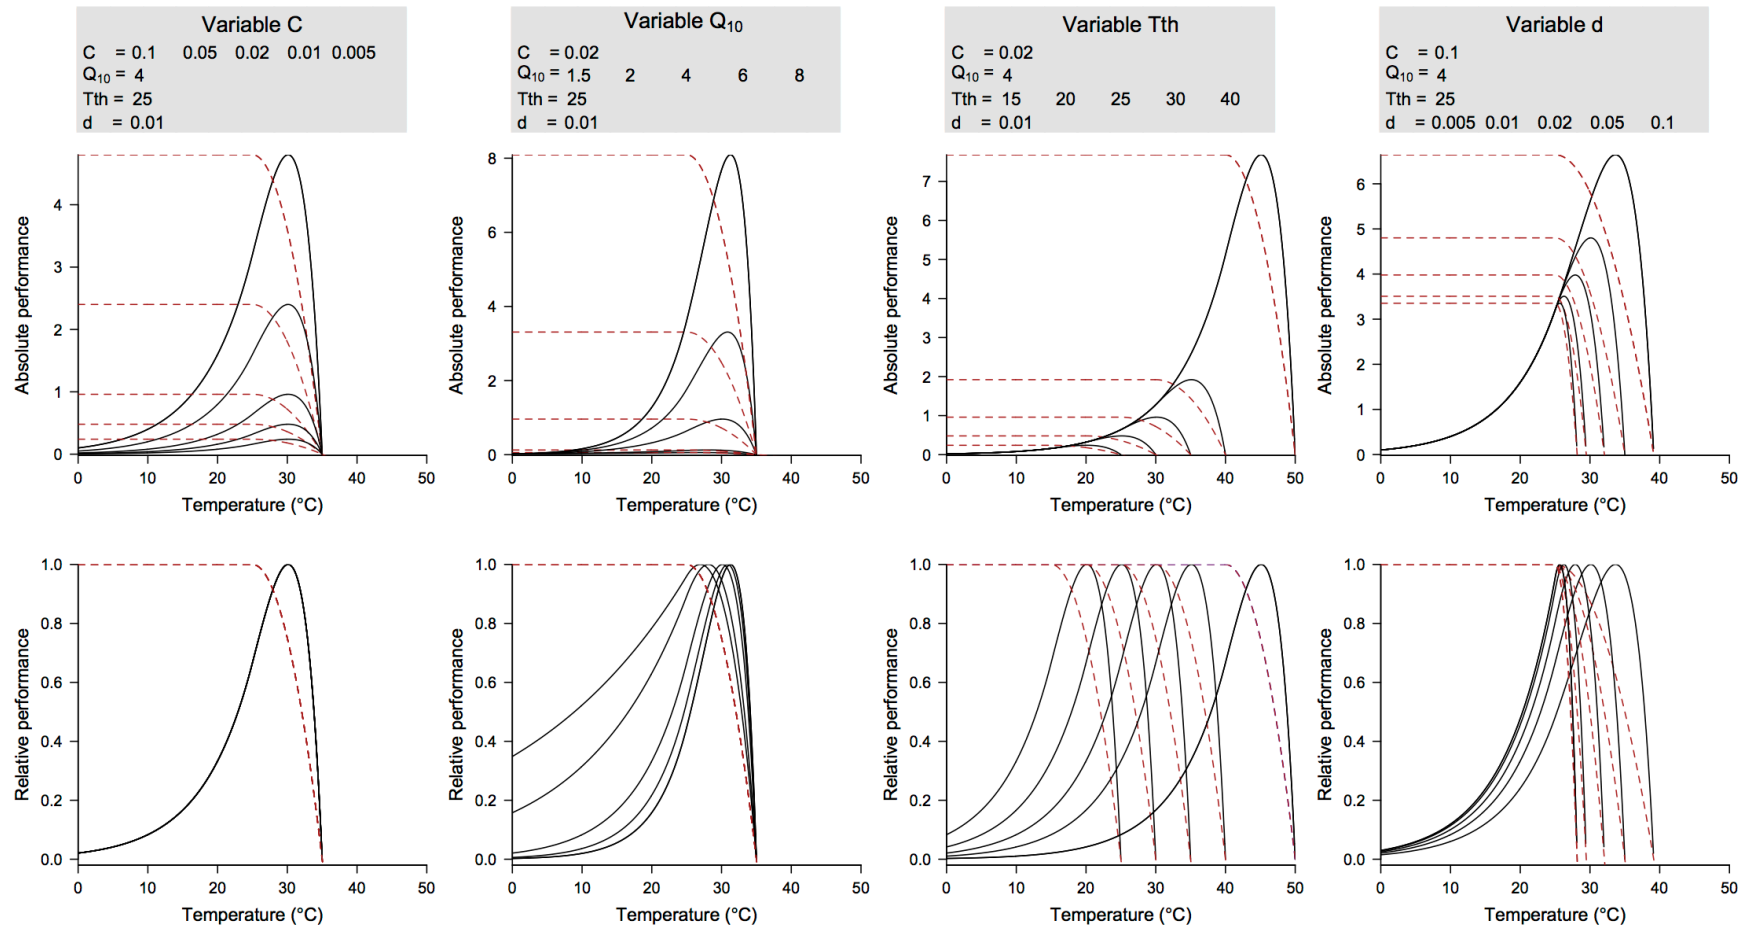

Figure S1. How each parameter in our model (see main text, eqn 3) affects the overall shape of the thermal performance curve can be studied by changing a single parameter at a time and maintaining everything else constant. Top and bottom panels show the same curve expressed in absolute units or as performance relative to the maximum set to 1.

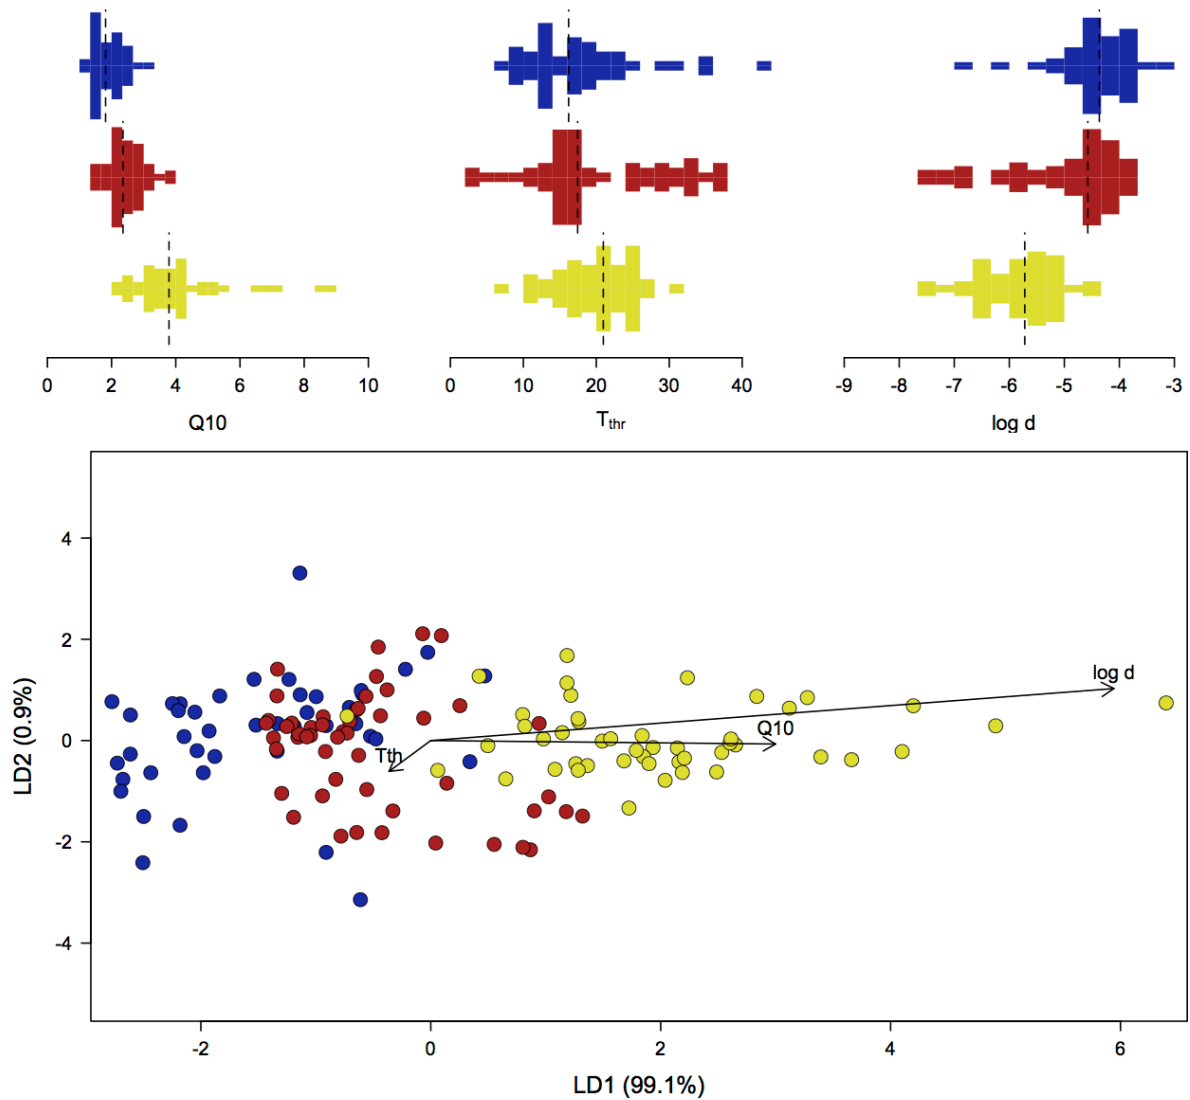

Figure S2. Results from discriminant analysis including parameters  $Q_{10}$ ,  $d$  and  $T_{th}$  to determine how curves obtained for photosynthetic rates (blue), running speed (red) and intrinsic rates of increase (yellow) might differ from one another (parameter  $C$  was not included because it has no effect on the overall shape of the curve; see Fig. S1). Note that  $Q_{10}$  and  $d$  vary in tandem with higher values resulting in curves with narrower thermal ranges.

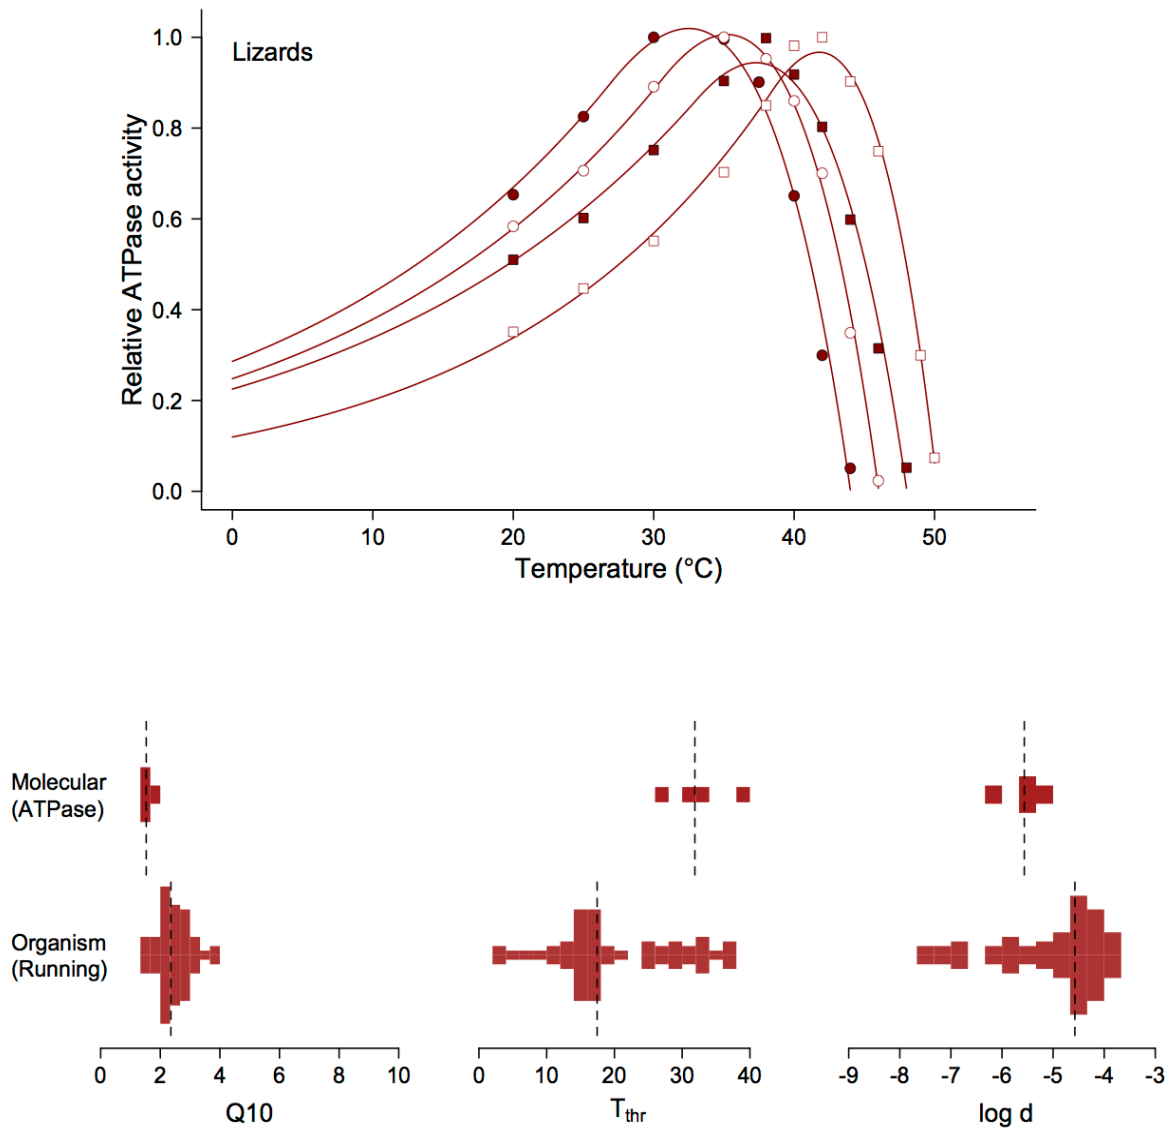

Figure S3. Calculation of parameters  $Q_{10}$ ,  $d$  and  $T_{th}$  for thermal performance curves on enzymatic activity reported for four species of lizards ( $n = 4$ , curve fit  $R^2 = 0.991 \pm 0.004$  SD), and comparison against parameters estimated for running performance. Note that these enzymatic activity curves exhibit a higher  $T_{breadth}$  than running performance (Fig. 4 in main text) primarily because  $Q_{10}$  is lower at this level of organization (Welch's unequal variances  $t$ -test,  $t = 10.3$ ,  $df = 35.1$ ,  $P = 4.0 \times 10^{-12}$ ). Consequently, significant differences across levels of organization are also observed within a single taxonomic group. Data from Licht 1967 (see main text).

## Appendix A

Table A1. Photosynthetic rates in plants as a function of ambient temperature (dataset *Biochemistry\_raw\_data.txt*).

Acclimation temperatures are provided within parenthesis with the species ID when multiple curves were reported.

| Species                         | Ambient Temperature (°C)                                                                               | Performance (nmol cm <sup>-2</sup> s <sup>-1</sup> ) | Reference            |
|---------------------------------|--------------------------------------------------------------------------------------------------------|------------------------------------------------------|----------------------|
| <i>Tidestromia oblongifolia</i> | ta = 16.7, 18, 20, 22, 27.5, 31, 32.3, 42, 46, 49, 52                                                  |                                                      | Berry & Bjorkman1980 |
|                                 | pf = 0.72, 0.87, 1.08, 1.3, 1.9, 2.33, 2.51, 3.57, 3.65, 3.56, 3.05                                    |                                                      |                      |
| <i>Atriplex glabriuscula</i>    | ta = 10.9, 15.3, 20.8, 25.4, 34.9, 39.9, 42.6                                                          |                                                      | Berry & Bjorkman1980 |
|                                 | pf = 0.61, 0.78, 1.27, 1.38, 1.3, 1.01, 0.77                                                           |                                                      |                      |
| <i>Atriplex sabulosa</i>        | ta = 13.1, 16.8, 20.8, 25.9, 30.9, 36, 40.8, 44.9                                                      |                                                      | Berry & Bjorkman1980 |
|                                 | pf = 2.2, 2.83, 3.34, 3.72, 3.8, 3.65, 3.1, 1.2                                                        |                                                      |                      |
| <i>Atriplex sabulosa</i>        | ta = 11.7, 15.7, 19.8, 24.9, 29.9, 35.3, 40.1, 45                                                      |                                                      | Berry & Bjorkman1980 |
|                                 | pf = 0.56, 0.71, 0.91, 1.22, 1.47, 1.59, 1.49, 0.6                                                     |                                                      |                      |
| <i>Tidestromia oblongifolia</i> | ta = 16.5, 23.3, 28.1, 31.9, 36.8, 41.1                                                                |                                                      | Berry & Bjorkman1980 |
|                                 | pf = 0.44, 0.83, 0.98, 0.96, 0.75, 0.35                                                                |                                                      |                      |
| <i>Tidestromia oblongifolia</i> | ta = 13.9, 17.5, 21.5, 24.9, 28, 32.1, 34.9, 40.7, 42.3, 44.9, 46.9, 48.5, 49.6, 51.1                  |                                                      | Berry & Bjorkman1980 |
|                                 | pf = 0.68, 1.26, 1.94, 2.6, 3.15, 3.94, 4.6, 5.36, 5.46, 5.47, 5.26, 4.87, 4.53, 3.97                  |                                                      |                      |
| <i>Atriplex lentiformis</i>     | ta = 10.2, 11.9, 13.7, 15.9, 18, 19.7, 22, 23.7, 25.7, 27.6, 29.6, 32.1, 34.2, 38, 42.7, 45.3, 47.1    |                                                      | Berry & Bjorkman1980 |
|                                 | pf = 0.47, 0.6, 0.69, 0.87, 1.02, 1.17, 1.46, 1.74, 2.01, 2.24, 2.41, 2.62, 2.81, 3.1, 3.09, 2.9, 2.32 |                                                      |                      |
| <i>Nerium oleander</i>          | ta = 10.6, 14.9, 19.5, 22.9, 25.9, 29.5, 34.9, 38.6, 42.6, 44.7                                        |                                                      | Berry & Bjorkman1980 |
|                                 | pf = 1.18, 1.53, 1.81, 1.87, 1.89, 1.9, 1.76, 1.52, 1.18, 0.54                                         |                                                      |                      |
| <i>Larrea divaricata</i>        | ta = 15.7, 20.8, 24.8, 29.8, 34.6, 39.7, 44.9, 48.6                                                    |                                                      | Berry & Bjorkman1980 |
|                                 | pf = 1.92, 2.22, 2.3, 2.3, 2.32, 1.96, 1.13, 0.07                                                      |                                                      |                      |
| <i>Larrea divaricata</i>        | ta = 16.3, 20.7, 24.4, 27.8, 33.9, 38.6, 40.8, 44.2, 48.3, 49.8                                        |                                                      | Berry & Bjorkman1980 |
|                                 | pf = 1.11, 1.48, 1.72, 2.01, 2.26, 2.33, 2.28, 2.12, 1.62, 1.38                                        |                                                      |                      |
| <i>Nerium oleander</i> (20°C)   | ta = 11.2, 15.4, 20, 23.7, 30.3, 35.1, 39.2, 41.6, 43, 45.4                                            |                                                      | Berry & Bjorkman1980 |
|                                 | pf = 1.18, 1.55, 1.81, 1.85, 1.85, 1.75, 1.52, 1.34, 1.18, 0.55                                        |                                                      |                      |

|                                       |                                                                                                                                                                                                                                                                                                          |                        |
|---------------------------------------|----------------------------------------------------------------------------------------------------------------------------------------------------------------------------------------------------------------------------------------------------------------------------------------------------------|------------------------|
| <i>Nerium oleander</i> (45°C)         | ta = 13.6, 18.6, 20, 23, 27.9, 31.8, 35.5, 40.1, 41.1, 42, 43.2, 44.1, 45.2, 46.1, 47, 47.9, 49, 49.9<br>pf = 0.69, 1.06, 1.17, 1.48, 2.04, 2.55, 3.07, 3.76, 3.85, 3.91, 3.97, 3.98, 3.99, 3.96, 3.83, 3.55, 2.85, 1.28                                                                                 | Berry & Bjorkman1980   |
| <i>Nerium oleander</i> (45°C)         | ta = 13.4, 19.3, 19.9, 22.6, 27, 31.5, 35.5, 39.5, 41.9, 48.9<br>pf = 0.59, 0.98, 0.99, 1.19, 1.47, 1.64, 1.68, 1.66, 1.56, 1.06                                                                                                                                                                         | Berry & Bjorkman1980   |
| <i>Hordeum vulgare</i> (15°C)         | ta = 15, 20, 25, 30, 35<br>pf = 4.01, 5.02, 5.61, 5.51, 3.7                                                                                                                                                                                                                                              | Bunce 2000             |
| <i>Vicia faba</i> (15°C)              | ta = 15, 20, 25, 30, 35<br>pf = 3.01, 3.81, 4.32, 4.21, 2.99                                                                                                                                                                                                                                             | Bunce 2000             |
| <i>Chenopodium album</i> (25°C)       | ta = 15, 20, 25, 30, 35<br>pf = 2.22, 2.92, 3.22, 3.31, 2.8                                                                                                                                                                                                                                              | Bunce 2000             |
| <i>Lycopersicon esculentum</i> (25°C) | ta = 15, 20, 25, 30, 35<br>pf = 1.4, 2.39, 3.19, 4.01, 3.79                                                                                                                                                                                                                                              | Bunce 2000             |
| <i>Glycine max</i> (25°C)             | ta = 15, 20, 25, 30, 35<br>pf = 1.4, 2.29, 3.39, 4.09, 3.88                                                                                                                                                                                                                                              | Bunce 2000             |
| <i>Abutilon theophrasti</i> (25°C)    | ta = 15, 20, 25, 30, 35<br>pf = 1.7, 2.88, 3.7, 4.5, 4.38                                                                                                                                                                                                                                                | Bunce 2000             |
| <i>Embothrium coccineum</i>           | ta = 10, 15, 20, 25, 30, 35<br>pf = 0.55, 0.79, 1.28, 1.39, 1.65, 1.45                                                                                                                                                                                                                                   | Castro-Arevalo EA 2008 |
| <i>Cercis canadensis</i>              | ta = 20, 25, 30, 35, 40, 45<br>pf = 1.19, 1.61, 2.12, 2.61, 2.89, 1.51                                                                                                                                                                                                                                   | Griffin EA 2004        |
| <i>Muhlenbergia glomerata</i> (14°C)  | ta = 5, 10, 15, 20, 25, 30, 35<br>pf = 0.28, 0.55, 0.87, 1.2, 1.61, 1.49, 1.03                                                                                                                                                                                                                           | Kubien & Sage 2004     |
| <i>Muhlenbergia glomerata</i> (26°C)  | ta = 5, 10, 15, 20, 25, 30, 35<br>pf = 0.32, 0.61, 1.02, 1.43, 2.15, 2.42, 2.27                                                                                                                                                                                                                          | Kubien & Sage 2004     |
| <i>Larrea divaricata</i> (20°C)       | ta = 16.7, 20.8, 21.3, 25.7, 29.6, 30.2, 34.2, 35.3, 39.3, 40.5, 43.3, 45.2, 47.4, 50.5, 51.4<br>pf = 2.97, 3.84, 3.86, 4.49, 5.08, 5.14, 5.45, 5.62, 5.45, 4.85, 4.81, 2.72, 3.12, 1.69, 1.21                                                                                                           | Mooney EA 1978         |
| <i>Larrea divaricata</i> (35°C)       | ta = 16.8, 21, 24.4, 28.3, 31.5, 32.1, 35, 35.7, 39.6, 41.9, 42.2, 46.2, 48.9, 51.2<br>pf = 2.12, 2.82, 3.43, 4.1, 4.86, 4.95, 5.64, 5.67, 6.05, 6.08, 5.99, 4.63, 3.53, 2.68                                                                                                                            | Mooney EA 1978         |
| <i>Larrea divaricata</i> (45°C)       | ta = 19, 22.4, 26.5, 31, 35.4, 40.2, 40.2, 44.2, 45, 46.7, 48.8, 51.1, 53.5<br>pf = 1.91, 2.56, 3.06, 3.87, 4.78, 5.46, 5.67, 5.89, 6.29, 5.71, 5.17, 3.73, 2.41                                                                                                                                         | Mooney EA 1978         |
| <i>Ipomoea batatas</i>                | ta = 9.9, 11.6, 15, 16, 17, 20, 20, 20, 20.4, 20.7, 23.9, 25, 24.9, 25.2, 25, 29.9, 29.9, 29.5, 29.9, 34, 35.1, 33.9, 33.9, 38.1, 37.5, 39.9<br>pf = 0.38, 0.59, 1, 1.2, 1.33, 1.52, 1.62, 1.88, 1.69, 1.73, 2.1, 2.15, 2.2, 2.27, 2.33, 2.43, 2.48, 2.54, 2.66, 2.43, 2.52, 2.56, 2.72, 2.36, 2.2, 1.96 | Sage & Kubien 2007     |
| <i>Muhlenbergia richardsonis</i>      | ta = 6.3, 9.6, 13.4, 17.7, 22, 24.3, 26.4, 30, 31.9, 34.9<br>pf = 0.41, 1.11, 1.61, 2.48, 3.65, 4.42, 4.68, 5, 5.01, 5.33                                                                                                                                                                                | Sage EA 2011 Fig1      |

|                                |                                                                                                                                                                                                                        |                         |
|--------------------------------|------------------------------------------------------------------------------------------------------------------------------------------------------------------------------------------------------------------------|-------------------------|
| <i>Carex helleri</i>           | ta = 7.8, 9.8, 14.7, 18.5, 22.4, 26.5, 27.2, 30.8, 33.5<br>pf = 0.97, 1.32, 1.74, 2.1, 1.93, 2.37, 2.37, 2.3, 2.22                                                                                                     | Sage EA 2011 Fig1       |
| <i>Atriplex patula</i> (15°C)  | ta = 3.6, 4.9, 5.6, 8.5, 10.2, 11.6, 13.3, 15.3, 16.9, 18.7, 20.5, 22.5, 24.6, 26.4<br>pf = 0.76, 1.05, 1.45, 1.77, 2.18, 2.47, 2.76, 2.98, 3.02, 3.05, 3.08, 3.08, 3.05, 2.98                                         | Sage EA 2011 Fig1       |
| <i>Atriplex rosea</i> (15°C)   | ta = 5.2, 6, 7.1, 9.1, 10.9, 11.9, 14.6, 15.4, 17.6, 19.2, 20.9, 23.3, 26.4, 28.7<br>pf = 0.44, 0.49, 0.76, 0.96, 1.17, 1.33, 1.72, 1.92, 2.43, 2.78, 3.01, 3.27, 3.52, 3.6                                            | Sage EA 2011 Fig1       |
| <i>Atriplex patula</i> (36°C)  | ta = 3.6, 5.3, 7.8, 9, 9.7, 11.2, 11.8, 13.7, 14.2, 15.6, 16.4, 17.9, 19.6, 22.1, 24.7, 27.2, 29.1<br>pf = 0.38, 0.51, 0.64, 0.81, 0.86, 1, 1.04, 1.22, 1.29, 1.42, 1.48, 1.66, 1.79, 1.91, 1.96, 2.01, 2.02           | Sage EA 2011 Fig1       |
| <i>Atriplex rosea</i> (30°C)   | ta = 11.3, 13.8, 15.5, 17.7, 19.1, 21.9, 23, 25.4, 27.5, 29.8<br>pf = 0.54, 0.75, 0.95, 1.22, 1.51, 1.64, 2.07, 2.51, 2.85, 3.16                                                                                       | Sage EA 2011 Fig1       |
| <i>Flaveria trinervia</i>      | ta = 15, 20, 25, 30, 35, 40<br>pf = 1.73, 2.56, 3.09, 3.48, 3.56, 3.42                                                                                                                                                 | Sage EA 2011 Fig1       |
| <i>Flaveria trinervia</i>      | ta = 20, 25, 27.5, 30, 32.5, 35, 37.5<br>pf = 2.19, 2.92, 3.23, 3.52, 3.73, 3.94, 3.85                                                                                                                                 | Sage EA 2011 Fig1       |
| <i>Flaveria cronquistii</i>    | ta = 20, 22.5, 25, 27.5, 30, 32.5, 35, 37.5, 40<br>pf = 1.75, 1.89, 2.03, 2.08, 2.14, 2.08, 1.96, 1.67, 1.41                                                                                                           | Sage EA 2011 Fig1       |
| <i>Chenopodium album</i>       | ta = 7.9, 9.6, 10.6, 14.4, 20.6, 23.4, 25.6, 27.4, 29.4, 31, 32, 33.8, 35.3, 36.7, 38, 38.1, 42, 43.2<br>pf = 0.9, 0.86, 1.45, 1.76, 2.47, 2.7, 2.73, 2.94, 2.94, 2.83, 3.09, 2.78, 3.24, 2.78, 2.83, 2.71, 2.88, 2.22 | Sage EA 2011 Fig2b      |
| <i>Spartina townsendii</i>     | ta = 5, 10, 15, 20, 25, 30, 35.1, 40.1<br>pf = 0.37, 0.8, 1.59, 2.15, 2.51, 2.75, 2.15, 0.23                                                                                                                           | Sage EA 2011 Fig3       |
| <i>Agropyron smithii</i>       | ta = 9.3, 12, 14.9, 19.9, 24.7, 29.8, 34.8, 37.3, 39.7, 40.8, 42.4, 44.9, 47.5, 50<br>pf = 2.19, 2.73, 3.19, 3.74, 4.17, 4.53, 4.83, 4.72, 4.78, 4.71, 4.64, 4.34, 3.88, 2.84                                          | Monson EA 1982 Fig1     |
| <i>Agropyron smithii</i>       | ta = 9.4, 12.5, 14.9, 20, 24.9, 29.9, 34.9, 39.9, 41.6, 43.9, 45, 47.1, 49.9<br>pf = 2.13, 2.48, 2.82, 3.23, 3.65, 3.78, 3.62, 3.52, 3.34, 3, 2.35, 1.92, 1.12                                                         | Monson EA 1982 Fig1     |
| <i>Capsicum annuum</i>         | ta = 8, 12.2, 16.3, 20.5, 24.5, 28.3, 32.7, 36.6<br>pf = 0.92, 1.65, 2.48, 3.14, 3.5, 3.87, 4.45, 4.85                                                                                                                 | Sage & Sharkey1987 Fig1 |
| <i>Lycopersicon esculentum</i> | ta = 9.1, 12, 16.2, 20.4, 24.2, 28.2, 32.3<br>pf = 1.52, 1.91, 2.66, 3.81, 5.28, 5.56, 5.78                                                                                                                            | Sage & Sharkey1987 Fig1 |
| <i>Scrophularis desertorum</i> | ta = 3.7, 8.9, 12.9, 16.5, 20.4, 24.5, 28.5, 34<br>pf = 1.35, 2.19, 2.88, 3.95, 4.5, 4.55, 4.54, 4.22                                                                                                                  | Sage & Sharkey1987 Fig1 |

## References:

- Berry, J. and Björkman, O. (1980) Photosynthetic response and adaptation to temperature in higher plants, *Annu Rev Physiol.* 31: 491–543.
- Bunce, J. A. (2000) Acclimation of photosynthesis to temperature in eight cool and warm climate herbaceous C<sub>3</sub> species: Temperature dependence of parameters of a biochemical photosynthesis model. *Photosynthesis Research* 63: 59–67.
- Castro-Arévalo, M. et al. (2008) Effects of low temperature acclimation on photosynthesis in three Chilean proteaceae. *Revista Chilena de Historia Natural* 81: 321–333.
- Griffin, J. J., Ranney, T. G. and Pharr, D. M. (2004) Heat and drought influence photosynthesis, water relations, and soluble carbohydrates of two ecotypes of redbud (*Cercis canadensis*). *J. Am. Soc. Horticultural Sci.* 129: 497–502.
- Kubien, D. S. and Sage, R. F. (2004) Dynamic photo-inhibition and carbon gain in a C<sub>4</sub> and a C<sub>3</sub> grass native to high latitudes. *Plant, Cell and Environment*, 27: 1424–1435.
- Monson, R. K. et al. (1982) Temperature dependence of photosynthesis in *Agropyron smithii*. *Plant Physiology*, 69: 929–934.
- Mooney, H. A., Bjorkman, O. and Collatz, G. J. (1978) Photosynthetic acclimation to temperature in the desert shrub, *Larrea divaricata*: I. Carbon dioxide exchange characteristics of intact leaves. *Plant Physiology*, 61: 406–410.
- Sage, R. F., Kocacinar, F. and Kubien, D. S. (2011) C<sub>4</sub> Photosynthesis and temperature. Chapter 10 in Raghavendra, A. S. and Sage, R. F. (eds) *C<sub>4</sub> Photosynthesis and Related CO<sub>2</sub> Concentrating Mechanisms*. Dordrecht: Springer Netherlands, pp. 161–195.
- Sage, R. F. and Kubien, D. S. (2007) The temperature response of C<sub>3</sub> and C<sub>4</sub> photosynthesis. *Plant, Cell and Environment* 30: 1086–1106.
- Sage, R. F. and Sharkey, T. D. (1987) The effect of temperature on the occurrence of O<sub>2</sub> and CO<sub>2</sub> insensitive photosynthesis in field grown plants. *Plant Physiol.* 84: 658–664.



Table A2. Running speeds in lizards as a function of ambient temperature (dataset *Running\_raw\_data.txt*).

Acclimation temperatures are provided within parenthesis with the species ID when multiple curves were reported.

| Species                          | Ambient Temperature (°C)                                                                                                 | Performance (m s <sup>-1</sup> ) | Reference           |
|----------------------------------|--------------------------------------------------------------------------------------------------------------------------|----------------------------------|---------------------|
| <i>Ctenotus regius</i>           | ta = 8.7, 9.7, 15.3, 20.4, 25.5, 30.5, 34.9, 37.3, 39.3<br>pf = 0, 0, 0.18, 0.44, 0.5, 0.89, 0.99, 0.68, 0               |                                  | Huey & Bennett 1987 |
| <i>Ctenotus taeniolatus</i>      | ta = 9.7, 11.4, 15.3, 20.4, 25.5, 30.5, 34.9, 37.3, 39.3, 44.7<br>pf = 0, 0, 0.29, 0.59, 0.79, 0.96, 1.05, 1.04, 1.18, 0 |                                  | Huey & Bennett 1987 |
| <i>Ctenotus uber</i>             | ta = 9.1, 9.7, 15.3, 20.4, 25.5, 30.5, 34.9, 37.3, 39.3, 45.5<br>pf = 0, 0, 0.36, 0.72, 1.09, 1.41, 1.64, 1.58, 1.65, 0  |                                  | Huey & Bennett 1987 |
| <i>Eremiascinus fasciolatus</i>  | ta = 9, 9.7, 15.3, 20.4, 25.5, 30.5, 34.9, 37.3, 39.3<br>pf = 0, 0.04, 0.24, 0.38, 0.5, 0.67, 0.83, 0.56, 0              |                                  | Huey & Bennett 1987 |
| <i>Hemiergis peronii</i>         | ta = 9.6, 9.7, 15.3, 20.4, 25.5, 30.5, 34.9, 37.3, 39.3<br>pf = 0, 0.11, 0.27, 0.39, 0.37, 0.49, 0.37, 0, 0              |                                  | Huey & Bennett 1987 |
| <i>Sphenomorphus kosciuskoi</i>  | ta = 2.5, 9.7, 15.3, 20.4, 25.5, 30.5, 34.9, 37.3, 39.3<br>pf = 0, 0.17, 0.34, 0.53, 0.7, 0.86, 1.04, 0.34, 0            |                                  | Huey & Bennett 1987 |
| <i>Sphenomorphus quoyi</i>       | ta = 6, 9.7, 15.3, 20.4, 25.5, 30.5, 34.9, 37.3, 39.3<br>pf = 0, 0, 0.69, 0.96, 1.27, 1.52, 1.21, 0, 0                   |                                  | Huey & Bennett 1987 |
| <i>Sphenomorphus tympanus</i>    | ta = 2.9, 9.7, 15.3, 20.4, 25.5, 30.5, 34.9, 37.3, 39.3<br>pf = 0, 0.24, 0.67, 0.93, 1.17, 1.42, 1.49, 0.94, 0           |                                  | Huey & Bennett 1987 |
| <i>Leiopisma entrecasteauxii</i> | ta = 2.5, 9.7, 15.3, 20.4, 25.5, 30.5, 34.9, 37.3, 39.3<br>pf = 0, 0.23, 0.37, 0.65, 0.88, 1.11, 1.18, 0.94, 0           |                                  | Huey & Bennett 1987 |
| <i>Leiopisma entrecasteauxii</i> | ta = 2.5, 9.7, 15.3, 20.4, 25.5, 30.5, 34.9, 37.3, 39.3<br>pf = 0, 0.13, 0.25, 0.41, 0.59, 0.73, 0.89, 0.67, 0           |                                  | Huey & Bennett 1987 |
| <i>Egernia whitii</i>            | ta = 4, 9.7, 15.3, 20.4, 25.5, 30.5, 34.9, 37.3, 42.8<br>pf = 0, 0.15, 0.31, 0.47, 0.67, 0.91, 0.93, 1.09, 0             |                                  | Huey & Bennett 1987 |
| <i>Sceloporus undulatus</i>      | ta = 11.4, 20, 25, 27.5, 30, 33, 36, 38, 40.4<br>pf = 0, 0.65, 1.33, 1.35, 1.6, 1.62, 1.73, 1.52, 0                      |                                  | Angiletta EA 2002   |

|                                         |                                                                                                                                                                                                                |                                       |
|-----------------------------------------|----------------------------------------------------------------------------------------------------------------------------------------------------------------------------------------------------------------|---------------------------------------|
| <i>Psammotromus hispanicus</i>          | ta = 25, 30, 32.5, 35, 37.5, 40, 45.5<br>pf = 0.79, 0.89, 1.12, 1.36, 1.34, 1.09, 0                                                                                                                            | Bauwens EA 1995                       |
| <i>Podarcis bocagei</i>                 | ta = 25, 30, 32.5, 35, 37.5, 40, 45.4<br>pf = 0.84, 1.09, 1.2, 1.33, 1.19, 1.06, 0                                                                                                                             | Bauwens EA 1995                       |
| <i>Podarcis h. hispanica</i>            | ta = 25, 30, 32.5, 35, 37.5, 40, 44.5<br>pf = 0.99, 1.42, 1.63, 1.65, 1.69, 1.41, 0                                                                                                                            | Bauwens EA 1995                       |
| <i>Podarcis h. atrata</i>               | ta = 25, 30, 32.5, 35, 37.5, 40, 44.6<br>pf = 0.65, 0.82, 1.07, 1.19, 1.2, 1.11, 0                                                                                                                             | Bauwens EA 1995                       |
| <i>Podarcis lilfordi</i>                | ta = 25, 30, 32.5, 35, 37.5, 40, 43.3<br>pf = 1.35, 1.77, 1.95, 2.04, 2.13, 1.95, 0                                                                                                                            | Bauwens EA 1995                       |
| <i>Lacerta agilis</i>                   | ta = 25, 30, 32.5, 35, 37.5, 40, 43.9<br>pf = 0.92, 1.21, 1.32, 1.54, 1.59, 1.37, 0                                                                                                                            | Bauwens EA 1995                       |
| <i>Lacerta schreiberi</i>               | ta = 25, 30, 32.5, 35, 37.5, 40, 43<br>pf = 1.11, 1.45, 1.52, 1.69, 1.68, 1.49, 0                                                                                                                              | Bauwens EA 1995                       |
| <i>Lacerta vivipara</i>                 | ta = 2.9, 20, 25, 27.5, 30, 32.5, 35, 40.5<br>pf = 0, 0.4, 0.53, 0.61, 0.73, 0.82, 0.83, 0                                                                                                                     | VanDamme EA 1991, McConnachie EA 2007 |
| <i>Podarcis tiliguerta</i>              | ta = 20, 25, 27.5, 30, 32.5, 35, 37.5, 43<br>pf = 1.07, 1.66, 1.82, 1.78, 1.9, 2.21, 2.34, 0                                                                                                                   | VanDamme EA 1989                      |
| <i>Hemidactylus frenatus</i>            | ta = 11.9, 15, 20, 25, 30, 34, 37.5, 40, 42.4<br>pf = 0, 0.65, 1.21, 1.67, 2.05, 2.09, 1.99, 1.88, 0                                                                                                           | Huey EA 1989                          |
| <i>Takydromus hsuehshanensis</i> (cold) | ta = 12, 15, 20, 25, 30, 32.5, 35, 37.5, 40, 43.1<br>pf = 0.29, 0.42, 0.72, 1.13, 1.5, 1.79, 1.91, 1.83, 1.51, 0                                                                                               | Huang & Tu 2008, 2009                 |
| <i>Takydromus hsuehshanensis</i> (warm) | ta = 12, 15, 20, 25, 30, 32.5, 35, 37.5, 40, 44.1<br>pf = 0.29, 0.42, 0.72, 1.18, 1.64, 2.07, 2.12, 1.96, 1.51, 0                                                                                              | Huang & Tu 2008, 2009                 |
| <i>Takydromus formosanus</i> (warm)     | ta = 12, 15, 20, 25, 30, 32.5, 35, 37.5, 40, 43.4<br>pf = 0.23, 0.39, 0.92, 1.39, 1.98, 2.33, 2.51, 2.4, 1.65, 0                                                                                               | Huang & Tu 2008, 2009                 |
| <i>Eumeces elegans</i>                  | ta = 9.4, 12.1, 14.2, 15.9, 17.5, 19.1, 21.7, 23.9, 25.3, 27.1, 30.2, 31.4, 32.6, 34.1, 35.1, 36.5, 38<br>pf = 0, 0.15, 0.2, 0.21, 0.32, 0.34, 0.39, 0.41, 0.44, 0.46, 0.47, 0.5, 0.55, 0.48, 0.48, 0.43, 0.21 | Du EA 2007                            |
| <i>Xantusia vigilis</i> (20°C)          | ta = 4.5, 12.5, 15, 20, 25, 30, 34, 37.5, 40.5<br>pf = 0, 0.27, 0.41, 0.69, 0.94, 1.05, 1.14, 0.19, 0                                                                                                          | Kaufmann & Bennett 1989               |
| <i>Xantusia vigilis</i> (30°C)          | ta = 9.4, 12.5, 15, 20, 25, 30, 34, 37.5, 43<br>pf = 0, 0.2, 0.37, 0.68, 0.94, 1.12, 1.16, 1.04, 0                                                                                                             | Kaufmann & Bennett 1989               |

|                                   |                                                                                                                                                    |                                        |
|-----------------------------------|----------------------------------------------------------------------------------------------------------------------------------------------------|----------------------------------------|
| <i>Platysaurus intermedius</i>    | ta = 8.8, 15, 20, 25, 30, 35, 40, 44.7<br>pf = 0, 0.72, 1.26, 1.61, 1.73, 1.85, 1.33, 0                                                            | Lailvaux EA 2003                       |
| <i>Xantusia riversiana</i>        | ta = 6.6, 10, 15, 20, 25, 28, 30, 35, 39<br>pf = 0, 0.32, 0.72, 1.09, 1.53, 1.45, 1.51, 1.44, 0                                                    | Mautz EA 1992                          |
| <i>Varanus griseus</i>            | ta = 18, 21, 25, 30, 35, 37, 41<br>pf = 0.9, 1.3, 1.6, 2.5, 3, 3, 2.81                                                                             | Okafor 2010                            |
| <i>Podarcis atrata</i>            | ta = 26, 31, 33, 35, 37, 39, 45<br>pf = 0.74, 0.92, 1.12, 1.29, 1.23, 1.14, 0                                                                      | Castilla & Bauwens 1991                |
| <i>Agama savignyi</i>             | ta = 12, 18, 22, 26, 30, 34, 38, 42, 47.2<br>pf = 0, 1.03, 1.44, 1.86, 2.44, 3, 2.91, 2.75, 0                                                      | Hertz EA 1982, Hertz EA 1983           |
| <i>Plestiodon gilberti</i>        | ta = 7.7, 20, 24, 28, 30, 32, 34, 36, 38, 42.3<br>pf = 0, 0.51, 0.76, 0.86, 0.87, 0.97, 1.05, 1.13, 1.02, 0                                        | Youssef EA 2008                        |
| <i>Takydromus septentrionalis</i> | ta = 4.9, 17, 20, 22, 24, 26, 28, 30, 32, 34, 36, 38, 40, 42.3<br>pf = 0, 0.31, 0.36, 0.6, 0.65, 0.68, 0.77, 0.77, 0.82, 0.74, 0.65, 0.56, 0.49, 0 | Xiang EA 1996                          |
| <i>Takydromus sexlineatus</i>     | ta = 6.4, 20, 22, 24, 26, 28, 30, 32, 34, 36, 38, 42.2<br>pf = 0, 0.46, 0.46, 0.59, 0.6, 0.64, 0.91, 1, 1.03, 0.91, 0.45, 0                        | Zhang & Ji 2004                        |
| <i>Gallotia stehlini</i>          | ta = 12.4, 24, 28, 32, 36, 40, 43.6<br>pf = 0, 2.15, 2.49, 2.72, 2.91, 2.86, 0                                                                     | Cejudo & Marquez 2001                  |
| <i>Gambelia wislizenii</i>        | ta = 11.6, 17, 20, 26, 30, 35, 38, 40<br>pf = 0, 0.6, 1.11, 2.69, 2.96, 3.3, 2.65, 3.34                                                            | Crowley & Pietruska 1983               |
| <i>Eremias brenchleyi</i>         | ta = 3.3, 19, 23, 26, 28, 31, 34, 36, 38, 40, 41, 43.6<br>pf = 0, 0.86, 1.18, 1.27, 1.32, 1.48, 1.45, 1.3, 1.03, 1.01, 0.97, 0                     | Xu & Ji 2006                           |
| <i>Eremias argus</i>              | ta = 1, 18, 20, 22, 24, 26, 28, 30, 32, 34, 36, 38, 44.9<br>pf = 0, 0.68, 0.82, 0.93, 1.05, 1.1, 1.15, 1.19, 1.24, 1.36, 1.41, 1.28, 0             | Lai-Gao EA 2006                        |
| <i>Sceloporus occidentalis</i>    | ta = 9.6, 15.1, 20.6, 25.6, 29.7, 34.7, 35.2, 39.4, 25.1<br>pf = 0.29, 1.05, 1.99, 2.64, 3.04, 3.07, 3.24, 3.18, 2.4                               | Marsh & Bennett 1986                   |
| <i>Dipsosaurus dorsalis</i>       | ta = 14.2, 15.7, 21, 25.5, 30.6, 34.6, 40.1, 44.2<br>pf = 0, 0.15, 1.55, 2.87, 3.24, 3.72, 4.27, 3.84                                              | Marsh & Bennett 1985, Simandle EA 2001 |
| <i>Anolis intermedius</i>         | ta = 11.1, 20.2, 26.3, 30.8, 38.4<br>pf = 0, 0.62, 0.94, 0.91, 0                                                                                   | Van Berkum 1986                        |
| <i>Anolis humilis</i>             | ta = 12.4, 22.3, 26.4, 30.5, 35.6<br>pf = 0, 0.87, 1.08, 1.05, 0                                                                                   | Van Berkum 1986                        |

|                               |                                                                                         |                |
|-------------------------------|-----------------------------------------------------------------------------------------|----------------|
| <i>Liolaemus baguali</i>      | ta = 5.2, 29.1, 33.1, 35.6, 37.6, 39.3, 43.5<br>pf = 0, 1.82, 2.16, 2.27, 2.16, 1.82, 0 | Bonino EA 2011 |
| <i>Liolaemus gallardoi</i>    | ta = 8.5, 27, 30.4, 33.2, 35.6, 37.9, 44.1<br>pf = 0, 1.46, 1.73, 1.82, 1.73, 1.46, 0   | Bonino EA 2011 |
| <i>Liolaemus hatcheri</i>     | ta = 7, 28.3, 31.8, 34.3, 36.4, 38.2, 43.1<br>pf = 0, 1.34, 1.6, 1.68, 1.6, 1.34, 0     | Bonino EA 2011 |
| <i>Liolaemus kingii</i>       | ta = 7.4, 27.1, 31, 34, 36.5, 38.7, 44.2<br>pf = 0, 1.94, 2.31, 2.43, 2.31, 1.94, 0     | Bonino EA 2011 |
| <i>Liolaemus kolengh</i>      | ta = 5.5, 26.1, 30.4, 33.7, 36.2, 38.5, 44<br>pf = 0, 1.06, 1.25, 1.32, 1.25, 1.06, 0   | Bonino EA 2011 |
| <i>Liolaemus magellanicus</i> | ta = 8.3, 24.2, 28, 31.2, 34, 36.7, 43.6<br>pf = 0, 0.89, 1.05, 1.11, 1.05, 0.89, 0     | Bonino EA 2011 |
| <i>Liolaemus zullyi</i>       | ta = 8.4, 27.1, 30.9, 33.8, 36.4, 38.5, 43.9<br>pf = 0, 1.34, 1.6, 1.68, 1.6, 1.34, 0   | Bonino EA 2011 |

---

## References:

- Angilletta, M. J., Hill, T. and Robson, M. A. (2002) Is physiological performance optimized by thermoregulatory behavior? *J Therm Biol.* 27: 199–204.
- Bauwens, D. et al. (1995) Evolution of sprint speed in lacertid lizards: morphological, physiological and behavioral covariation. *Evolution* 49: 848–863.
- Bonino, M. F. et al. (2011) Running in cold weather: Morphology, thermal biology, and performance in the southernmost lizard clade in the world (*Liolaemus lineomaculatus* section: Liolaemini: Iguania). *J Exp Zool* 315A: 495–503.
- Castilla, A. M. and Bauwens, D. (1991) Thermal biology, microhabitat selection, and conservation of the insular lizard *Podarcis hispanica atrata*. *Oecologia* 85: 366–374.
- Cejudo, D. and Márquez, R. (2001) Sprint performance in the lizards *Gallotia simonyi* and *Gallotia stehlini* (Lacertidae): implications for species management. *Herpetologica* 57: 87–98.
- Crowley, S. R. and Pietruszka, R. D. (1983) Aggressiveness and vocalization in the leopard lizard (*Gambelia wislizenii*): the influence of temperature. *Anim Behav* 31: 1055–1060.
- Du, W. G. et al. (2007) Thermal dependence of food assimilation and locomotor performance in juvenile blue-tailed skinks, *Eumeces elegans*. *Anim Biol* 57: 29–38.
- Hertz, P. E., Huey, R. B. and Nevo, E. (1982) Fight versus flight: body temperature influences defensive responses of lizards. *Anim Behav* 30: 676–679.
- Hertz, P. E., Huey, R. B. and Nevo, E. (1983) Homage to Santa Anita: thermal sensitivity of sprint speed in agamid lizards. *Evolution* 37: 1075–1084.
- Huang, S. P. and Tu, M. C. (2008) Heat tolerance and altitudinal distribution of a mountainous lizard, *Takydromus hsuehshanensis*, in Taiwan. *J Therm Biol* 33: 48–56.
- Huey, R. B. et al. (1989) Thermal biology of nocturnal ectotherms: is sprint performance of geckos maximal at low body temperatures? *Physiol Zool* 62: 488–504.
- Huey, R. B. and Bennett, A. F. (1987) Phylogenetic studies of coadaptation: preferred temperatures versus optimal performance temperatures of lizards. *Evolution*, 41: 1098–1115.
- Kaufmann, J. S. and Bennett, A. F. (1989) The effect of temperature and thermal acclimation on locomotor performance in *Xantusia vigilis*, the desert night lizard, *Physiol Zool* 62: 1047–1058.
- Lailvaux, S. P., Alexander, G. J. and Whiting, M. J. (2003) Sex-based differences and similarities in locomotor performance, thermal preferences, and escape behaviour in the lizard *Platysaurus intermedius wilhelmi*. *Physiol Biochem Zool* 76: 511–521.
- Luo, L., Qu, Y. and Ji, X. (2006) Thermal dependence of food assimilation and sprint speed in a lacertid lizard *Eremias argus* from northern China. *Acta Zool Sinica* 52: 256–262.
- Marsh, R. L. and Bennett, A. F. (1985) Thermal dependence of isotonic contractile properties of skeletal muscle and sprint performance of the lizard *Dipsosaurus dorsalis*. *J Comp Physiol B* 155: 541–551.
- Marsh, R. L. and Bennett, A. F. (1986) Thermal dependence of sprint performance of the lizard *Sceloporus occidentalis*. *J Exp Biol* 126: 79–87.
- Mautz, W., Daniels, C. and Bennett, A. f. (1992) Thermal dependence of locomotion and aggression in a xantusiid lizard. *Herpetologica*, 48: 271–279.
- McConnachie, S., Alexander, G. J. and Whiting, M. J. (2007) Lower temperature tolerance in the temperate, ambush foraging lizard *Pseudocordylus melanotus melanotus*. *J Therm Biol* 32: 66–71.
- Okafor, A. I. (2010) The influence of body temperature on sprint speed and anti-predatory defensive responses of the North African monitor lizard, *Varanus griseus*. *African J Biotech* 9: 778–781.

- Simandle, E. T. et al. (2001) Lizards, lipids, and dietary links to animal function. *Physiol Biochem Zool* 74: 625–640.
- Van Berkum, F. H. (1986) Evolutionary patterns of the thermal sensitivity of sprint speed in anolis lizards. *Evolution* 40: 594–604.
- Van Berkum, F. H. (1988) Latitudinal patterns of the thermal sensitivity of sprint speed in lizards. *Am Nat* 132: 327–343.
- Van Damme, R. et al. (1989) Altitudinal variation of the thermal biology and running performance in the lizard *Podarcis tiliguerta*. *Oecologia* 80: 516–524.
- Van Damme, R., Bauwens, D. and Verheyen, R. F. (1991) The thermal dependence of feeding behaviour, food consumption and gut-passage time in the lizard *Lacerta vivipara*. *Funct Ecol* 5: 507–517.
- Xiang, J., Weiguo, D. and Pingyue, S. (1996) Body temperature, thermal tolerance and influence of temperature on sprint speed and food assimilation in adult grass lizards, *Takydromus septentrionalis*. *J Therm Biol* 21: 155–162.
- Xu, X. F. and Ji, X. (2006) Ontogenetic shifts in thermal tolerance, selected body temperature and thermal dependence of food assimilation and locomotor performance in a lacertid lizard, *Eremias brenchleyi*. *Comp Biochem Physiol* 143A: 118–124.
- Youssef, M. K., Adolph, S. C. and Richmond, J. Q. (2008) Evolutionarily conserved thermal biology across continents: the North American lizard *Plestiodon gilberti* (Scincidae) compared to Asian *Plestiodon*. *J Therm Biol* 33: 308–312.
- Zhang, Y. P. and Ji, X. (2004) The thermal dependence of food assimilation and locomotor performance in southern grass lizards, *Takydromus sexlineatus* (Lacertidae). *J Therm Biol* 29: 45–53.

Table A3. Intrinsic rates of population increase in insects as a function of ambient temperature (dataset *Fitness\_raw\_data.txt*).  
 Acclimation temperatures are provided within parenthesis with the species ID when multiple curves were reported.

| Species                         | Ambient Temperature (°C)                            | Performance (day <sup>-1</sup> )                      | Reference                      |
|---------------------------------|-----------------------------------------------------|-------------------------------------------------------|--------------------------------|
| <i>Acarus farris</i>            | ta = 7, 10, 15, 20, 25, 29                          | pf = 0.01, 0.05, 0.13, 0.2, 0.25, 0.1                 | Sanchez-Ramos & Castañera 2007 |
| <i>Aphelinus semiflavus</i>     | ta = 10, 15.6, 18.3, 21.1, 23.9, 26.7               | pf = 0, 0.09, 0.24, 0.34, 0.2, 0                      | Force & Messenger 1964         |
| <i>Aphis gossypii</i>           | ta = 10, 15, 20, 25, 30, 35                         | pf = 0.06, 0.15, 0.28, 0.37, 0.31, 0.32               | Parajulee 2007                 |
| <i>Aphis gossypii</i>           | ta = 15, 17.5, 20, 22.5, 25, 27.5, 30, 32.5         | pf = 0.21, 0.29, 0.36, 0.42, 0.53, 0.44, 0.43, 0.13   | Satar EA 2005                  |
| <i>Aphis gossypii</i>           | ta = 10, 15, 20, 25, 30                             | pf = 0.06, 0.18, 0.32, 0.42, 0.36                     | Zamani EA 2006                 |
| <i>Busseola fusca</i>           | ta = 18, 21, 24, 27, 30, 32                         | pf = 0.09, 0.15, 0.19, 0.28, 0.25, 0.17               | Bruce EA 2009                  |
| <i>Busseola fusca</i>           | ta = 18, 21, 24, 27, 30, 32                         | pf = 0.09, 0.15, 0.2, 0.28, 0.29, 0.27                | Bruce EA 2009                  |
| <i>Cactoblastis castorum</i>    | ta = 18, 22, 26, 30, 34                             | pf = 0.01, 0.03, 0.05, 0.06, 0.03                     | Legaspi EA 2007                |
| <i>Calandra oryzae</i>          | ta = 13, 15.2, 18.2, 23, 25.5, 29.1, 32.3, 33.5, 35 | pf = 0, 0, 0.02, 0.06, 0.09, 0.11, 0.07, 0.02, 0      | Birch 1953                     |
| <i>Cotesia plutellae</i>        | ta = 15, 20, 25, 30, 32.5, 35                       | pf = 0.07, 0.16, 0.27, 0.29, 0.25, 0                  | Liu EA 2000                    |
| <i>Cryptolestes ferrugineus</i> | ta = 20, 22.5, 25, 27.5, 30, 32.5, 35, 37.5, 40     | pf = 0, 0.03, 0.06, 0.08, 0.1, 0.12, 0.14, 0.09, 0.07 | Smith 1965                     |
| <i>Dactylopius austrinus</i>    | ta = 20, 22.5, 25, 27.5, 30, 32, 34                 |                                                       | Hosking 1984                   |

|                                |                                                                                              |                             |
|--------------------------------|----------------------------------------------------------------------------------------------|-----------------------------|
| <i>Diaphorina citri</i>        | pf = 0.04, 0.07, 0.1, 0.13, 0.15, 0.14, 0.09<br>ta = 15, 20, 25, 28, 30                      | Liu & Tsai 2000             |
| <i>Ebcarsia bimaculata</i>     | pf = 0.04, 0.09, 0.16, 0.2, 0.13<br>ta = 20, 23, 26, 29, 32                                  | Qiu EA 2007                 |
| <i>Eretmocerus furuhashii</i>  | pf = 0.08, 0.13, 0.19, 0.22, 0.21<br>ta = 23, 29, 20, 26, 32                                 | Qiu EA 2007                 |
| <i>Gonatocerus triguttatus</i> | pf = 0.1, 0.17, 0.03, 0.15, 0.16<br>ta = 15, 20, 25, 30, 33                                  | Pilkington & Hodle 2007     |
| <i>Hyperaspis notata</i>       | pf = 0.04, 0.13, 0.28, 0.27, 0.21<br>ta = 18, 20, 25, 30, 32, 34                             | Dreyer EA 1997              |
| <i>Hyperaspis notata</i>       | pf = 0.02, 0.06, 0.08, 0.1, 0.06, 0<br>ta = 18, 20, 25, 30, 32, 34                           | Dreyer EA 1997              |
| <i>Hypothenemus hampei</i>     | pf = 0.02, 0.06, 0.07, 0.12, 0.08, 0<br>ta = 20, 23, 25, 27, 30                              | Jaramillo EA 2009           |
| <i>Liposcelis badia</i>        | pf = 0.06, 0.1, 0.14, 0.12, 0.1<br>ta = 20, 22.5, 25, 27.5, 30, 32.5, 35                     | Jiang EA 2008               |
| <i>Liposcelis decolor</i>      | pf = 0.02, 0.02, 0.03, 0.05, 0.04, 0.02, 0<br>ta = 20, 22.5, 25, 27.5, 30, 32.5, 35, 37.5    | Tang EA 2008                |
| <i>Liposcelis entomophila</i>  | pf = 0.02, 0.03, 0.04, 0.04, 0.05, 0.06, 0.05, 0.01<br>ta = 20, 22.5, 25, 27.5, 30, 32.5, 35 | Dong EA 2007                |
| <i>Liposcelis paeta</i>        | pf = 0.02, 0.03, 0.04, 0.07, 0.06, 0.05, 0.04<br>ta = 22.5, 25, 27.5, 30, 32.5, 35, 37.5     | Wang EA 2009                |
| <i>Liposcelis tricolor</i>     | pf = 0.02, 0.03, 0.04, 0.04, 0.05, 0.05, 0.05<br>ta = 20, 22.5, 25, 27.5, 30, 32.5, 35       | Dong EA 2007                |
| <i>Liriomyza sativae</i>       | pf = 0.01, 0.01, 0.02, 0.03, 0.04, 0.03, 0.01<br>ta = 15, 20, 25, 30, 35                     | Haghani EA 2006             |
| <i>Macrolophus pygmaeus</i>    | pf = 0.02, 0.11, 0.2, 0.19, 0<br>ta = 15, 20, 25, 27.5, 30                                   | Perdikis & Lykouressis 2002 |
| <i>Macrolophus pygmaeus</i>    | pf = 0.04, 0.07, 0.1, 0.1, 0.08<br>ta = 15, 20, 25, 27.5, 30                                 | Perdikis & Lykouressis 2002 |
| <i>Macrosiphum euphorbiae</i>  | pf = 0.04, 0.06, 0.1, 0.1, 0.07<br>ta = 5, 10, 15, 20, 25, 30                                | Barlow 1962                 |



|                                      |                                                                                    |                         |
|--------------------------------------|------------------------------------------------------------------------------------|-------------------------|
| <i>Myzus persicae</i>                | pf = 0.05, 0.11, 0.17, 0.22, 0.16, 0<br>ta = 5, 10, 15, 20, 25, 30                 | Barlow 1962             |
| <i>Myzus persicae</i>                | pf = 0.07, 0.12, 0.34, 0.45, 0.45, 0<br>ta = 5, 10, 15, 20, 25, 30, 32             | Davis EA 2006           |
| <i>Paronychiurus kimi</i>            | pf = 0, 0.08, 0.12, 0.26, 0.22, 0.22, 0<br>ta = 17, 20, 22, 25, 28                 | Choi EA 2002            |
| <i>Phyllonorycter corylifoliella</i> | pf = 0.04, 0.07, 0.07, 0.09, 0.05<br>ta = 15, 20, 25, 30, 33                       | Amiri EA 2010           |
| <i>Rhizopertha dominica</i>          | pf = 0.03, 0.07, 0.1, 0.1, 0.05<br>ta = 18.3, 29, 32.3, 34, 38.2, 38.6             | Birch 1953              |
| <i>Sesamia calamistis</i>            | pf = 0, 0.08, 0.1, 0.11, 0.04, 0<br>ta = 18, 21, 24, 27, 30, 32                    | Bruce EA 2009           |
| <i>Sesamia calamistis</i>            | pf = 0.08, 0.15, 0.16, 0.28, 0.2, 0.17<br>ta = 18, 21, 24, 27, 30, 32              | Bruce EA 2009           |
| <i>Sesamia nonagrioides</i>          | pf = 0.1, 0.14, 0.2, 0.28, 0.3, 0.29<br>ta = 18, 21, 24, 27, 30, 32                | Bruce EA 2009           |
| <i>Sesamia nonagrioides</i>          | pf = 0.08, 0.16, 0.17, 0.25, 0.21, 0.15<br>ta = 18, 21, 24, 27, 30, 32             | Bruce EA 2009           |
| <i>Sitobion miscanthi</i>            | pf = 0.1, 0.18, 0.22, 0.28, 0.27, 0.26<br>ta = 12, 15, 20, 25, 28                  | Turak EA 1998           |
| <i>Stethorus punctillum</i>          | pf = 0.08, 0.13, 0.25, 0.28, 0.09<br>ta = 14, 16, 20, 24, 28, 30, 32, 34           | Roy EA 2003             |
| <i>Thrips tabaci</i>                 | pf = 0, 0.01, 0.05, 0.1, 0.11, 0.17, 0.12, 0<br>ta = 15, 20, 23, 25, 30            | Murai2000               |
| <i>Toxoptera citricidus</i>          | pf = 0.06, 0.11, 0.15, 0.17, 0.02<br>ta = 11.3, 15.2, 19.9, 21.5, 25.1, 27.1, 29.9 | Komazaki 1982           |
| <i>Trichogramma bruni</i>            | pf = 0.07, 0.14, 0.19, 0.32, 0.32, 0.42, 0.16<br>ta = 15, 20, 25, 30, 35           | Kalyebi EA 2006         |
| <i>Trichogramma mwanzai</i>          | pf = 0.08, 0.14, 0.21, 0.26, 0<br>ta = 15, 20, 25, 30, 35                          | Kalyebi EA 2006         |
| <i>Trichogramma pretiosum</i>        | pf = 0.11, 0.19, 0.34, 0.32, 0.1<br>ta = 18, 20, 22, 25, 30, 32                    | Pratissoli & Parra 2000 |

|                                    |                                                                                                |                        |
|------------------------------------|------------------------------------------------------------------------------------------------|------------------------|
| <i>Trichogrammatoidea lutea</i>    | pf = 0.11, 0.15, 0.2, 0.31, 0.35, 0.31<br>ta = 15, 20, 25, 30, 35                              | Kalyebi EA 2006        |
| <i>Trioxys utilis</i>              | pf = 0.05, 0.16, 0.26, 0.44, 0.22<br>ta = 10, 15.6, 18.3, 21.1, 23.9, 26.7                     | Force & Messenger 1964 |
| <i>Tetraneura nigriabdominalis</i> | pf = 0, 0.18, 0.28, 0.48, 0.43, 0<br>ta = 10, 15, 20, 25, 30<br>pf = 0, 0.05, 0.12, 0.21, 0.24 | Kuo EA 2006            |

---

## References:

- Amiri, A. et al. (2010) Effect of temperature on demographic parameters of the Hawthorn Red Midget Moth, *Phyllonorycter corylifoliella*, on Apple. *J Insect Sc* 10:1–12.
- Barlow, C. A. (1962) The influence of temperature on the growth of experimental populations of *Myzus persicae* (Sulzer) and *Macrosiphum euphorbiae* (Thomas). *Can J Zool* 40: 145–156.
- Birch, L. C. (1953) Experimental background to the study of the distribution and abundance of insects: I. The influence of temperature, moisture and food on the innate capacity for increase of three grain beetles. *Ecology* 34: 698–711.
- Bruce, A. Y., Schulthess, F. and Mueke, J. (2009) Host acceptance, suitability, and effects of host deprivation on the West African egg parasitoid *Telenomus isis* (Hymenoptera: Scelionidae) reared on East African stemborers under varying temperature and relative humidity regimens. *Environmen Entomol* 38: 904–919.
- Choi, W., Ryoo, M. and Kim, J. G. (2002) Biology of *Paronychiurus kimi* (Collembola: Onychiuridae) under the influence of temperature, humidity and nutrition. *Pedobiologia* 46: 548–557.
- Davis, J. A., Radcliffe, E. B. and Ragsdale, D. W. (2006) Effects of high and fluctuating temperatures on *Myzus persicae* (Hemiptera: Aphididae). *Environmen Entomol* 35: 1461–1468.
- Dong, P. et al. (2007) Development and reproduction of the psocid *Liposcelis tricolor* (Psocoptera: Liposcelididae) as a function of temperature. *Ann Entomol Soc Am* 100: 228–235.
- Force, D. C. and Messenger, P. S. (1964) Fecundity, reproductive rates, and innate capacity for increase of three parasites of *Therioaphis Maculata* (Buckton). *Ecology* 45: 706–715.
- Haghani, M. et al. (2006) Comparative demography of *Liriomyza sativae* Blanchard (Diptera: Agromyzidae) on cucumber at seven constant temperatures. *Insect Sci* 13: 477–483.
- Hosking, J. R. (1984) The effect of temperature on the population growth potential of *Dactylopusus austrinus* De Lotto (Homoptera: Dactylopiidae), on *Opuntia acirantzaca* Lindley. *J Aust Entomol Soc* 23:133-139.
- Jaramillo, J. et al. (2009) Thermal tolerance of the coffee berry borer *Hypothenemus hampei*: Predictions of climate change impact on a tropical insect pest. *PLoS ONE* 4: 1–11.
- Jiang, H.-B. et al. (2008) Temperature-dependent development and reproduction of a novel stored product psocid, *Liposcelis badia* (Psocoptera: Liposcelididae), *Environmen Entomol* 37: 1105–1112.
- Kalyebi, A. et al. (2006) The effect of temperature and humidity on the bionomics of six African egg parasitoids (Hymenoptera: Trichogrammatidae). *Bull Entomol Res* 96: 305–314.
- Komazaki, S. (1982) Effects of constant temperatures on population growth of three aphid species, *Toxoptera citricidus* (Kirkaldy), *Aphis citricola* (Van Der Goot) and *Aphis gossypii* (Glover) (Homoptera : Aphididae) on Citrus. *Appl Entomol Zool* 17: 75–81.
- Kuo, M.-H. et al. (2006) Temperature-dependent development and population growth of *Tetraneura nigriabdominalis* (Homoptera: Pemphigidae) on three host plants, *J Economic Entomol* 99: 1209–1213.
- Legaspi, J. C. and Legaspi Jr., B. C. (2007) Life table analysis for *Cactoblastis cactorum* immatures and female adults under five constant temperatures: implications for pest management. *Environmen Entomol* 100: 497–505.

- Liu, S. et al. (2000) Biology of *Oomyzus sokolowskii* and effect of temperature on its population parameters. *Acta Entomol Sinica* 43: 159–167.
- Liu, Y. H. and Tsai, J. H. (2000) Effects of temperature on biology and life table parameters of the Asian citrus psyllid, *Diaphorina citri* Kuwayama (Homoptera: Psyllidae). *Ann Appl Biol* 137: 201–206.
- Murai, T. (2000) Effect of temperature on development and reproduction of the onion thrips, *Thrips tabaci* Lindeman (Thysanoptera: Thripidae), on pollen and honey solution. *Appl Entomol Zool* 35: 499–504.
- Parajulee, M. N. (2007) Influence of constant temperatures on life history parameters of the cotton aphid, *Aphis gossypii*, infesting cotton. *Environmen Entomol* 36: 666–672.
- Perdikis, D. C. and Lykouressis, D. P. (2002) Life table and biological characteristics of *Macrolophus pygmaeus* when feeding on *Myzus persicae* and *Trialeurodes vaporariorum*. *Entomologia Experimentalis et Applicata* 102: 261–272.
- Pilkington, L. J. and Hoddle, M. S. (2007) Use of life tables to quantify reproductive and developmental biology of *Gonatocerus triguttatus* (Hymenoptera: Mymaridae), an egg parasitoid of *Homalodisca vitripennis* (Hemiptera: Cicadellidae). *Biol Control* 42: 1–8.
- Pratissoli, D. and Parra, J. R. P. (2000) Fertility life table of *Trichogramma pretiosum* (Hym., Trichogrammatidae) in eggs of *Tuta absoluta* and *Phthorimaea operculella* (Lep., Gelechiidae) at different temperatures. *J Appl Entomol* 124: 339–342.
- Qiu, B. L. et al. (2007) Suitability of *Bemisia tabaci* (Hemiptera: Aleyrodidae) instars for the parasitization by *Encarsia bimaculata* and *Eretmocerus sp. nr. furuhashii* (Hymenoptera: Aphelinidae) on glabrous and hirsute host plants. *Biocontrol Sci Tech* 17: 823–839.
- Roy, M., Brodeur, J. and Cloutier, C. (2003) Effect of temperature on intrinsic rates of natural increase of a coccinellid and its spider mite prey. *BioControl*, 48: 57–72.
- Sánchez-Ramos, I. and Castañera, P. (2007) Effect of temperature on reproductive parameters and the longevity of *Acarus farris* (Acari: Acaridae). *J Stored Prod Res* 43: 578–586.
- Satar, S., Kersting, U. and Uygun, N. (2005) Effect of temperature on development and fecundity of *Aphis gossypii* Glover (Homoptera: Aphididae) on cucumber. *J Pest Sci* 78: 133–137.
- Smith, L. B. (1965) The intrinsic rate of natural increase of *Cryptolestes ferrugineus* (Stephens), *J Stored Prod Res* 1: 35–49.
- Stäubli Dreyer, B. et al. (1997) The influence of temperature on the life table of *Hyperaspis notata*, *Entomologia Experimentalis et Applicata* 84: 85–92.
- Tang, P.-A. et al. (2008) Development, survival, and reproduction of the psocid *Liposcelis decolor* (Psocoptera: Liposcelidae) at constant temperatures. *Ann Entomol Soc Am* 101: 1017–1025.
- Turak, E. et al. (1998) Different responses to temperature in three closely-related sympatric cereal aphids. *Entomologia Experimentalis et Applicata* 86: 49–58.
- Wang, J.-J. et al. (2009) Development, survival, and reproduction of the Psocid *Liposcelis paeta* (Psocoptera: Liposcelidae) as a function of temperature. *J Econom Entomol* 102: 1705–1713.
- Zamani, A. A. et al. (2006) Effect of temperature on biology and population growth parameters of *Aphis gossypii* Glover (Hom., Aphididae) on greenhouse cucumber. *J Appl Entomol* 130: 453–460.

## Appendix B

Script for R that include the functions to fit the thermal performance model developed in our study (eqn 3 in main text) employing non-linear regression and a function to plot the curves based on parameters  $Q_{10}$ ,  $C$ ,  $d$  and  $T_{th}$ .

```
# File - Thermal_function.R

# Functions to perform analyses and plot thermal performance curves

# fit.thermal.curve - fits non-linear thermal curve to empirical data (ta vs performance)
# plot.thermal.curve - plot thermal curves with different parameters (q10,cte,thr and decay)

# -----Function 'fit.thermal.curve'----- #

# Nonlinear fitting to analyze empirical thermal performance curves.

'fit.thermal.curve' <-
function(ta,pf,xlab="ta",ylab="pf",plot=TRUE){
  xx <- matrix(1,13)
  raw.pf <- pf
  pf <- pf/max(pf)
  test <- data.frame(ta=ta,pf=pf)
  q10 <- seq(1.5,3.5,by=0.1)
  CTE <- seq(0.00,0.1,by=0.02)
  thr <- seq(10,35,by=2)
  decay <- seq(0.000,0.01,by=0.002)
  out <- c(NA,NA,NA,NA,NA)
  for (i in 1:length(q10)){
    for (j in 1:length(CTE)){
      for (l in 1:length(thr)){
        for (k in 1:length(decay)){
          pf.therm <- CTE[j]*10^(log10(q10[i])/(10/ta))
          pf.state <- ifelse(ta<thr[l],1,1-decay[k]*(thr[l]-ta)^2)
          pf.tot <- pf.therm*pf.state
          out <- rbind(out,c(q10[i],CTE[j],thr[l],decay[k],sum((pf.tot-pf)^2)))
        }}}
  }
  out <- out[order(out[,5]),]
  out.min <- out[which(out[,5] == min(na.omit(out[,5]))),]
  opt <- function(ta,q10,CTE,thr,decay)
    {ifelse(ta<thr,(CTE*10^(log10(q10)/(10/ta))),(CTE*10^(log10(q10)/(10/ta)))*(1-decay*(thr-
ta)^2))}
  m.opt <- nls(pf ~ opt(ta, q10, CTE, thr,decay), data = test, start = list(q10 = out.min[1],CTE =
out.min[2], thr = out.min[3], decay = out.min[4]), trace = T,control = list(maxiter=5000,warnOnly
= TRUE,minFactor = 0))
  r.square <- summary(lm(pf ~ predict(m.opt)))$r.squared
  q10 <- summary(m.opt)$coefficients[1]
  CTE <- summary(m.opt)$coefficients[2]
  thr <- summary(m.opt)$coefficients[3]
  decay <- summary(m.opt)$coefficients[4]
  ta1 <- seq(0,50,by=0.1)
  pf.therm <- CTE*10^(log10(q10)/(10/ta1))
  pf.state <- ifelse(ta1<thr,1,1-decay*(thr-ta1)^2)
  pf.tot <- pf.therm*pf.state
  ta.opt <- ta1[which(pf.tot==max(pf.tot))]
  pf.tot <- ifelse(pf.tot<0,NA,pf.tot)
  k <- -10*(1-decay*(10/log(q10)+sqrt(1/decay + (10/log(q10))^2)))
  breadth.50 <- as.numeric(breadth.thermal.curve(q10,CTE,thr,decay,breadth=0.5)[3])
}
```

```

breadth.80 <- as.numeric(breadth.thermal.curve(q10,CTE,thr,decay,breadth=0.8)[3])
max.y <- max(raw.pf)*max(na.omit(pf.tot))

if(plot==TRUE){
plot(ta,raw.pf,type="b",xlab=xlab,ylab=ylab,xaxs="i",yaxs="i",bty="l",xlim=c(0,50),ylim=c(-
0.02,max.y*1.25),las=1,bg="red",cex=1.3,pch=21)
points(ta1,max.y*pf.tot/max(na.omit(pf.tot)),type="l",col="red")}

if(m.opt$convInfo$stopMessage == 'converged'){
xx[1,1] <- q10
xx[1,2] <- summary(m.opt)$coefficients[2]*max(raw.pf)
xx[1,3] <- thr
xx[1,4] <- decay
xx[1,5] <- thr + (1/decay)^0.5
xx[1,6] <- max(na.omit(pf.tot))*max(raw.pf)
xx[1,7] <- ta.opt
xx[1,8] <- breadth.50
xx[1,9] <- breadth.80
xx[1,10] <- r.square
xx[1,11] <- length(test$pf)
xx[1,12] <- attr(logLik(m.opt), "df")
xx[1,13] <- AIC(m.opt)}

colnames(xx) <-
c("q10", "cte", "thr", "decay", "ctmax", "max.pf", "ta.opt", "breadt.50", "breadth.80", "r.square", "n.samples", "K.param", "AIC")
xx <- data.frame(xx)
list(xx,paste(m.opt$convInfo$stopMessage))}

```

```
# ----- Function 'plot.thermal.curve' ----- #
```

```
# Function to plot different curves (reduced model) manipulating q10, CTE, thr and decay
```

```

'plot.thermal.curve' <-
function(q10,CTE,thr,decay,points=FALSE,bound=FALSE,xlab="ta",ylab="pf",col.q10="red",col.th="blue"
,col="black",...){
q10 <- as.numeric(q10)
CTE <- as.numeric(CTE)
thr <- as.numeric(thr)
decay <- as.numeric(decay)
ta <- seq(0,50,by=0.1)
pf.therm <- CTE*10^(log10(q10)/(10/ta))
pf.state <- ifelse(ta<thr,1,1-decay*(thr-ta)^2)
pf.tot <- pf.therm*pf.state
if(bound==TRUE){pf.therm <- pf.therm/max(pf.tot);pf.tot <- ifelse(pf.tot<0,NA,pf.tot/max(pf.tot))}
else{pf.tot <- ifelse(pf.tot<0,NA,pf.tot)}
if(points==FALSE){plot(ta,pf.tot,type="l",las=1,xlab=xlab,ylab=ylab,ylim=c(-
0.02,max(na.omit(pf.tot))),xaxs="i",yaxs="i",bty="l",col=col)}
else{points(ta,pf.tot,type="l",col=col)}
points(ta,pf.state*max(na.omit(pf.tot)),type="l",lty=2,col=col.th)
points(ta,pf.therm,type="l",lty=2,col=col.q10)}

```

```

# ----- Function 'breadth.thermal.curve' ----- #
# Function to obtain the breadth of the thermal curve for a given fraction of maximum performance
# (e.g., 80% or 50%, etc)
'breadth.thermal.curve' <- function(q10,CTE,thr,decay,breadth){
  q10 <- as.numeric(q10)
  CTE <- as.numeric(CTE)
  thr <- as.numeric(thr)
  decay <- as.numeric(decay)
  ta.opt <- thr-10/(log(q10))+sqrt(1/decay + (10/log(q10))^2)
  max.pf <- (CTE*10^(log10(q10)/(10/ta.opt)))*(1-decay*(thr-ta.opt)^2)
  ta <- seq(0,50,by=0.01)
  pf.therm <- (CTE/max.pf)*10^(log10(q10)/(10/ta))
  pf.state <- ifelse(ta<thr,1,1-decay*(thr-ta)^2)
  pf.tot <- pf.therm*pf.state
  ta <- ta[range(which(pf.tot > breadth))]
  ta.breadth <- ta[2] - ta[1]
  data.frame(ta.low = ta[1],ta.high = ta[2], ta.breadth = ta.breadth)}

# ----- EXAMPLES ----- #

# Example 1
# Function fit.thermal.curve
# Parameters of the thermal curve of running speeds
# from Ctenotus_regius and Eremiascincus_fasciolatus (Huey & Bennett 1987 Evolution 41:1098-1115;
# Table 2)

# ta <- c(9.7,15.3,20.4,25.5,30.5,34.9,37.3,39.3)          # ambient temperature
# cr <- c(0.00,0.18,0.44,0.50,0.89,0.99,0.68,0.00)      # running speed C_regius
# ef <- c(0.04,0.24,0.38,0.50,0.67,0.83,0.56,0)        # running speed E_fasciolatus

# par(mfrow=c(1,2))
# fit.thermal.curve(ta,cr,xlab="temperature",ylab="running speed (m/s)",plot=TRUE)
# fit.thermal.curve(ta,ef,xlab="temperature",ylab="running speed (m/s)",plot=TRUE)

# Example 2
# Function plot.thermal.curve
# Estimating thermal curve parameters for C_regius and plotting
# its components in standard units between 0 and 1 ('bound = TRUE').

# ta <- c(9.7,15.3,20.4,25.5,30.5,34.9,37.3,39.3)          # ambient temperature
# cr <- c(0.00,0.18,0.44,0.50,0.89,0.99,0.68,0.00)      # running speed C_regius

# par(mfrow=c(1,2))
# fit <- as.data.frame(fit.thermal.curve(ta,cr,xlab="temperature",ylab="running speed (m/s)"))
# plot.thermal.curve(fit[1],fit[2],fit[3],fit[4],xlab=substitute("temperature"),ylab="relative
# performance")

```

## Appendix C

Table C1. Parameters and descriptors of the thermal performance curve obtained with the approach developed here (file *All\_parameters\_data.txt*)

| Species                               | Code        | Type    | <i>n</i> | $Q_{10}$ | <i>C</i> | $T_{th}$ | <i>d</i> | $CT_{max}$ | $P_{max}$ | $T_{opt}$ | $T_{breadth}$ | $R^2$ |
|---------------------------------------|-------------|---------|----------|----------|----------|----------|----------|------------|-----------|-----------|---------------|-------|
| <i>Tidestromia oblongifolia</i>       | tophoto     | biochem | 11       | 2.01     | 0.2745   | 22.1     | 0.00080  | 57.5       | 3.7       | 46.0      | 22.2          | 0.995 |
| <i>Atriplex glabriuscula</i>          | aohotphoto  | biochem | 7        | 1.62     | 0.4204   | 16.5     | 0.00115  | 46.0       | 1.4       | 31.8      | 31.7          | 0.894 |
| <i>Atriplex sabulosa</i>              | ascoolphoto | biochem | 8        | 1.60     | 1.2654   | 13.7     | 0.00090  | 47.0       | 3.9       | 31.9      | 33.9          | 0.979 |
| <i>Atriplex sabulosa</i>              | ashotphoto  | biochem | 8        | 2.24     | 0.2439   | -6.0     | 0.00036  | 46.7       | 1.6       | 35.8      | 26.4          | 0.997 |
| <i>Tidestromia oblongifolia</i>       | tocoolphoto | biochem | 6        | 1.81     | 0.1984   | 20.0     | 0.00192  | 42.8       | 1.0       | 31.5      | 25.2          | 0.946 |
| <i>Tidestromia oblongifolia</i>       | tohotphoto  | biochem | 14       | 2.07     | 0.4136   | 21.4     | 0.00088  | 55.2       | 5.6       | 44.1      | 23.4          | 0.990 |
| <i>Atriplex lentiformis</i>           | alhotphoto  | biochem | 17       | 2.12     | 0.2813   | 18.7     | 0.00095  | 51.2       | 3.3       | 40.5      | 25.0          | 0.990 |
| <i>Nerium oleander</i>                | nocoolphoto | biochem | 10       | 1.44     | 0.8710   | 12.5     | 0.00083  | 47.2       | 1.9       | 29.3      | 39.9          | 0.963 |
| <i>Larrea divaricata</i>              | ldcoolphoto | biochem | 8        | 1.12     | 1.6789   | 30.4     | 0.00291  | 48.9       | 2.4       | 32.3      | 44.4          | 0.993 |
| <i>Larrea divaricata</i>              | ldhotphoto  | biochem | 10       | 1.57     | 0.5772   | 20.2     | 0.00086  | 54.3       | 2.3       | 38.7      | 34.4          | 0.988 |
| <i>Nerium oleander</i> (20°C)         | no20cphoto1 | biochem | 10       | 1.44     | 0.8592   | 12.4     | 0.00079  | 48.0       | 1.9       | 29.9      | 40.4          | 0.958 |
| <i>Nerium oleander</i> (45°C)         | no45cphoto  | biochem | 18       | 1.66     | 0.4656   | 42.6     | 0.01340  | 51.2       | 4.2       | 44.4      | 19.6          | 0.972 |
| <i>Nerium oleander</i> (45°C)         | no45cphoto1 | biochem | 10       | 1.62     | 0.3888   | 19.0     | 0.00084  | 53.5       | 1.7       | 38.5      | 33.7          | 0.955 |
| <i>Hordeum vulgare</i> (15°C)         | hv15photo   | biochem | 5        | 1.79     | 1.6934   | 12.1     | 0.00137  | 39.1       | 5.7       | 27.0      | 27.3          | 0.999 |
| <i>Vicia faba</i> (15°C)              | vf15photo   | biochem | 5        | 1.64     | 1.4411   | 16.8     | 0.00190  | 39.7       | 4.4       | 27.1      | 28.2          | 1.000 |
| <i>Chenopodium album</i> (25°C)       | ca25photo   | biochem | 5        | 1.61     | 1.1194   | 16.2     | 0.00149  | 42.1       | 3.4       | 28.5      | 30.3          | 0.982 |
| <i>Lycopersicon esculentum</i> (25°C) | le25photo   | biochem | 5        | 2.52     | 0.3685   | 16.1     | 0.00168  | 40.5       | 4.1       | 32.0      | 19.8          | 0.996 |
| <i>Glycine max</i> (25°C)             | gm25photo   | biochem | 5        | 2.54     | 0.3585   | 18.1     | 0.00205  | 40.2       | 4.3       | 31.9      | 19.1          | 0.998 |
| <i>Abutilon theophrasti</i> (25°C)    | at25photo   | biochem | 5        | 2.31     | 0.5197   | 16.3     | 0.00158  | 41.4       | 4.6       | 32.2      | 21.3          | 0.992 |
| <i>Embothrium coccineum</i>           | ecphoto     | biochem | 6        | 2.08     | 0.2792   | 14.4     | 0.00142  | 41.0       | 1.6       | 30.6      | 23.7          | 0.973 |
| <i>Cercis canadensis</i>              | cccphoto    | biochem | 6        | 1.66     | 0.4503   | 35.4     | 0.00706  | 47.3       | 2.9       | 38.7      | 21.7          | 0.997 |
| <i>Muhlenbergia glomerata</i> (14°C)  | mg1410photo | biochem | 7        | 2.33     | 0.2412   | 12.1     | 0.00150  | 37.9       | 1.6       | 28.7      | 21.4          | 0.979 |
| <i>Muhlenbergia glomerata</i> (26°C)  | mg2622photo | biochem | 7        | 2.65     | 0.2313   | 11.2     | 0.00120  | 40.1       | 2.5       | 31.6      | 20.1          | 0.995 |
| <i>Larrea divaricata</i> (20°C)       | ld20photo   | biochem | 15       | 1.38     | 1.9631   | 24.5     | 0.00126  | 52.7       | 5.3       | 35.5      | 39.3          | 0.921 |
| <i>Larrea divaricata</i> (35°C)       | ld35photo   | biochem | 14       | 1.66     | 1.0007   | 28.1     | 0.00156  | 53.5       | 5.9       | 40.5      | 28.6          | 0.972 |
| <i>Larrea divaricata</i> (45°C)       | ld45photo   | biochem | 13       | 1.66     | 0.7853   | 34.8     | 0.00233  | 55.5       | 5.9       | 43.7      | 23.9          | 0.986 |
| <i>Ipomoea batatas</i>                | spotphoto   | biochem | 26       | 2.10     | 0.3724   | 15.7     | 0.00128  | 43.7       | 2.7       | 33.3      | 24.0          | 0.944 |
| <i>Muhlenbergia richardsonis</i>      | muhphoto    | biochem | 10       | 2.58     | 0.4751   | 13.6     | 0.00134  | 40.9       | 5.4       | 32.3      | 20.2          | 0.979 |
| <i>Carex helleri</i>                  | carphoto    | biochem | 9        | 1.73     | 0.7509   | 9.4      | 0.00092  | 42.4       | 2.4       | 28.9      | 30.8          | 0.931 |
| <i>Atriplex patula</i> (15°C)         | ap15photo   | biochem | 14       | 2.24     | 0.9099   | 6.9      | 0.00168  | 31.3       | 3.3       | 21.9      | 21.7          | 0.929 |



|                                         |           |         |    |      |        |      |         |      |     |      |      |       |
|-----------------------------------------|-----------|---------|----|------|--------|------|---------|------|-----|------|------|-------|
| <i>Atriplex rosea</i> (15°C)            | ar15photo | biochem | 14 | 3.17 | 0.3362 | 9.9  | 0.00176 | 33.8 | 3.7 | 26.6 | 16.9 | 0.991 |
| <i>Atriplex patula</i> (36°C)           | ap30photo | biochem | 17 | 2.45 | 0.3621 | 8.9  | 0.00149 | 34.8 | 2.1 | 25.9 | 20.6 | 0.986 |
| <i>Atriplex rosea</i> (30°C)            | ar30photo | biochem | 10 | 2.77 | 0.1935 | 22.6 | 0.00429 | 37.9 | 3.2 | 31.0 | 15.5 | 0.992 |
| <i>Flaveria trinervia</i>               | ft1photo  | biochem | 6  | 1.69 | 0.8627 | 17.0 | 0.00098 | 48.9 | 3.7 | 35.1 | 31.1 | 0.974 |
| <i>Flaveria trinervia</i>               | ft2photo  | biochem | 7  | 1.85 | 0.6444 | 20.0 | 0.00131 | 47.6 | 3.9 | 35.8 | 26.7 | 0.998 |
| <i>Flaveria cronquistii</i>             | fcphoto   | biochem | 9  | 1.33 | 1.0006 | 22.8 | 0.00189 | 45.8 | 2.1 | 29.7 | 39.7 | 0.989 |
| <i>Chenopodium album</i>                | chnaphoto | biochem | 18 | 1.67 | 0.8046 | 13.2 | 0.00076 | 49.4 | 3.1 | 34.7 | 33.3 | 0.901 |
| <i>Spartina townsendii</i>              | sptphoto  | biochem | 8  | 2.15 | 0.4598 | 12.2 | 0.00126 | 40.3 | 2.7 | 30.2 | 23.6 | 0.971 |
| <i>Agropyron smithii</i>                | ags1photo | biochem | 14 | 1.48 | 1.7029 | 11.4 | 0.00051 | 55.7 | 4.9 | 37.1 | 40.9 | 0.982 |
| <i>Agropyron smithii</i>                | ags2photo | biochem | 13 | 1.41 | 1.6442 | 13.6 | 0.00067 | 52.1 | 3.8 | 32.8 | 43.2 | 0.975 |
| <i>Capsicum annuum</i>                  | caa1photo | biochem | 8  | 1.97 | 0.7562 | 11.2 | 0.00074 | 48.0 | 4.8 | 36.1 | 27.9 | 0.973 |
| <i>Lycopersicon esculentum</i>          | lyepphoto | biochem | 7  | 2.30 | 0.7108 | 18.8 | 0.00248 | 38.9 | 6.0 | 30.2 | 19.6 | 0.990 |
| <i>Scrophularia desertorum</i>          | scrphoto  | biochem | 8  | 1.86 | 1.3373 | 9.7  | 0.00107 | 40.3 | 4.9 | 28.2 | 27.7 | 0.950 |
| <i>Ctenotus regius</i>                  | cr        | run     | 9  | 3.09 | 0.0302 | 28.2 | 0.00814 | 39.3 | 1.0 | 33.6 | 12.8 | 0.972 |
| <i>Ctenotus taeniolatus</i>             | ct        | run     | 10 | 2.79 | 0.0577 | 14.5 | 0.00109 | 44.7 | 1.1 | 36.5 | 19.5 | 0.946 |
| <i>Ctenotus uber</i>                    | cu        | run     | 10 | 2.74 | 0.0829 | 15.9 | 0.00115 | 45.5 | 1.7 | 37.2 | 19.7 | 0.976 |
| <i>Eremiascinus fasciolatus</i>         | ef        | run     | 9  | 2.36 | 0.0520 | 31.4 | 0.01587 | 39.3 | 0.9 | 33.8 | 13.4 | 0.961 |
| <i>Hemiergis peronii</i>                | hp        | run     | 9  | 2.31 | 0.0616 | 14.3 | 0.00169 | 38.7 | 0.4 | 29.5 | 21.2 | 0.796 |
| <i>Sphenomorphus kosciuskoi</i>         | sk        | run     | 9  | 2.33 | 0.0820 | 25.9 | 0.00573 | 39.2 | 1.0 | 31.9 | 16.3 | 0.917 |
| <i>Sphenomorphus quoyi</i>              | sq        | run     | 9  | 2.55 | 0.1387 | 15.2 | 0.00181 | 38.7 | 1.4 | 30.3 | 19.5 | 0.828 |
| <i>Sphenomorphus tympanus</i>           | st        | run     | 9  | 3.29 | 0.0957 | 3.0  | 0.00076 | 39.4 | 1.6 | 31.9 | 18.0 | 0.970 |
| <i>Leiopisma entrecasteauxii</i>        | lea       | run     | 9  | 2.08 | 0.1239 | 31.2 | 0.01497 | 39.4 | 1.3 | 33.5 | 15.0 | 0.966 |
| <i>Leiopisma entrecasteauxii</i>        | leb       | run     | 9  | 2.10 | 0.0790 | 32.5 | 0.02120 | 39.3 | 0.9 | 34.1 | 14.0 | 0.978 |
| <i>Egernia whitii</i>                   | ew        | run     | 9  | 3.16 | 0.0503 | 4.6  | 0.00068 | 42.8 | 1.0 | 35.1 | 18.6 | 0.978 |
| <i>Sceloropus undulatus</i>             | su        | run     | 9  | 3.82 | 0.0467 | 13.3 | 0.00135 | 40.5 | 1.9 | 34.0 | 15.5 | 0.948 |
| <i>Psammodromus hispanicus</i>          | ph        | run     | 7  | 1.71 | 0.1994 | 33.1 | 0.00656 | 45.5 | 1.3 | 36.8 | 21.2 | 0.979 |
| <i>Podarcis bocagei</i>                 | pb        | run     | 7  | 1.68 | 0.2332 | 29.9 | 0.00415 | 45.4 | 1.3 | 35.4 | 23.6 | 0.995 |
| <i>Podarcis h. hispanica</i>            | phh       | run     | 7  | 2.19 | 0.1409 | 26.6 | 0.00310 | 44.5 | 1.7 | 35.8 | 19.4 | 0.998 |
| <i>Podarcis h. atrata</i>               | pha       | run     | 7  | 1.98 | 0.1133 | 32.8 | 0.00713 | 44.6 | 1.2 | 37.0 | 17.9 | 0.994 |
| <i>Podarcis lilfordi</i>                | pl        | run     | 7  | 1.40 | 0.6213 | 37.5 | 0.03034 | 43.3 | 2.2 | 38.1 | 24.6 | 0.992 |
| <i>Lacerta agilis</i>                   | la        | run     | 7  | 1.65 | 0.2653 | 35.2 | 0.01339 | 43.9 | 1.6 | 37.0 | 19.8 | 0.999 |
| <i>Lacerta schreiberi</i>               | ls        | run     | 7  | 1.40 | 0.5097 | 37.1 | 0.02836 | 43.0 | 1.8 | 37.7 | 24.9 | 0.991 |
| <i>Lacerta vivipara</i>                 | lv        | run     | 8  | 3.64 | 0.0321 | 3.1  | 0.00071 | 40.6 | 0.8 | 33.6 | 16.8 | 0.990 |
| <i>Podarcis tiliguerta</i>              | pt2       | run     | 8  | 1.46 | 0.5868 | 36.3 | 0.02209 | 43.0 | 2.3 | 37.1 | 23.0 | 0.976 |
| <i>Hemidactylus frenatus</i>            | hf        | run     | 9  | 2.92 | 0.1205 | 13.5 | 0.00118 | 42.6 | 2.3 | 34.7 | 18.7 | 0.912 |
| <i>Takydromus hsuehshanensis</i> (cold) | thc       | run     | 10 | 2.28 | 0.1309 | 29.4 | 0.00532 | 43.1 | 2.0 | 35.6 | 16.9 | 0.993 |
| <i>Takydromus hsuehshanensis</i> (warm) | thw       | run     | 10 | 2.46 | 0.1254 | 24.0 | 0.00250 | 44.0 | 2.0 | 35.8 | 18.7 | 0.988 |
| <i>Takydromus formosanus</i> (warm)     | tfw       | run     | 10 | 2.82 | 0.1080 | 20.4 | 0.00190 | 43.3 | 2.4 | 35.6 | 18.0 | 0.989 |
| <i>Eumeces elegans</i>                  | ee        | run     | 17 | 2.65 | 0.0484 | 12.1 | 0.00131 | 39.8 | 0.5 | 31.4 | 19.9 | 0.917 |
| <i>Xantusia vigilis</i> (20°C)          | xv20      | run     | 9  | 2.23 | 0.1320 | 17.4 | 0.00196 | 40.0 | 1.0 | 30.8 | 21.0 | 0.844 |
| <i>Xantusia vigilis</i> (30°C)          | xv30      | run     | 9  | 2.51 | 0.0945 | 15.9 | 0.00137 | 42.9 | 1.2 | 34.2 | 20.5 | 0.959 |
| <i>Platysaurus intermedius</i>          | pi        | run     | 8  | 2.13 | 0.2419 | 15.1 | 0.00115 | 44.6 | 1.9 | 34.2 | 24.1 | 0.926 |
| <i>Xantusia riversiana</i>              | xr        | run     | 9  | 2.81 | 0.1371 | 11.3 | 0.00130 | 39.0 | 1.7 | 31.0 | 19.1 | 0.954 |
| <i>Varanus griseus</i>                  | vg1       | run     | 7  | 2.21 | 0.2330 | 25.7 | 0.00229 | 46.6 | 3.1 | 37.5 | 20.5 | 0.992 |
| <i>Podarcis atrata</i>                  | pa        | run     | 7  | 1.83 | 0.1514 | 32.6 | 0.00655 | 45.0 | 1.2 | 36.7 | 19.6 | 0.990 |

|                                   |         |     |    |      |        |      |         |      |     |      |      |       |
|-----------------------------------|---------|-----|----|------|--------|------|---------|------|-----|------|------|-------|
| <i>Agama savignyi</i>             | as1     | run | 9  | 2.51 | 0.1815 | 17.3 | 0.00112 | 47.2 | 3.1 | 38.2 | 21.2 | 0.968 |
| <i>Plestiodon gilberti</i>        | pg1     | run | 10 | 3.14 | 0.0516 | 8.8  | 0.00089 | 42.4 | 1.1 | 34.7 | 18.3 | 0.965 |
| <i>Takydromus septentrionalis</i> | ts1     | run | 14 | 2.22 | 0.0928 | 17.7 | 0.00165 | 42.3 | 0.8 | 32.8 | 21.9 | 0.936 |
| <i>Takydromus sexlineatus</i>     | tsex    | run | 12 | 2.14 | 0.0909 | 26.2 | 0.00402 | 42.0 | 0.9 | 33.6 | 18.7 | 0.892 |
| <i>Gallotia stehlini</i>          | gst     | run | 7  | 2.95 | 0.1409 | 15.3 | 0.00124 | 43.7 | 3.2 | 35.9 | 18.5 | 0.929 |
| <i>Gambelia wislizenii</i>        | gwis    | run | 8  | 2.67 | 0.1740 | 19.7 | 0.00162 | 44.5 | 3.4 | 36.3 | 19.2 | 0.892 |
| <i>Eremias brenchleyi</i>         | ebren   | run | 12 | 2.15 | 0.2098 | 11.6 | 0.00097 | 43.7 | 1.5 | 33.2 | 24.7 | 0.939 |
| <i>Eremias argus</i>              | earg    | run | 13 | 2.26 | 0.1700 | 7.6  | 0.00072 | 44.9 | 1.4 | 34.6 | 24.5 | 0.977 |
| <i>Sceloporus occidentalis</i>    | scelocc | run | 9  | 2.24 | 0.3467 | 15.4 | 0.00110 | 45.6 | 3.4 | 35.6 | 23.4 | 0.953 |
| <i>Dipsosaurus dorsalis</i>       | dipdors | run | 8  | 2.69 | 0.1767 | 18.7 | 0.00113 | 48.4 | 4.5 | 40.0 | 20.0 | 0.922 |
| <i>Anolis intermedius</i>         | anint   | run | 5  | 2.98 | 0.0616 | 15.6 | 0.00192 | 38.4 | 1.0 | 31.0 | 17.3 | 0.933 |
| <i>Anolis humilis</i>             | anhum   | run | 5  | 3.69 | 0.0446 | 16.9 | 0.00285 | 35.6 | 1.1 | 29.4 | 14.4 | 0.948 |
| <i>Liolaemus baguali</i>          | Lbag    | run | 7  | 2.85 | 0.1065 | 17.0 | 0.00143 | 43.5 | 2.2 | 35.6 | 18.6 | 0.995 |
| <i>Liolaemus gallardoii</i>       | Lgal    | run | 7  | 2.34 | 0.1586 | 17.6 | 0.00144 | 44.0 | 1.8 | 34.8 | 21.5 | 0.964 |
| <i>Liolaemus hatcheri</i>         | Lhat    | run | 7  | 2.65 | 0.1004 | 17.7 | 0.00156 | 43.1 | 1.6 | 34.8 | 19.4 | 0.987 |
| <i>Liolaemus kingii</i>           | Lkin    | run | 7  | 2.39 | 0.2019 | 17.1 | 0.00137 | 44.1 | 2.4 | 35.0 | 21.4 | 0.976 |
| <i>Liolaemus kolench</i>          | Lkol    | run | 7  | 2.31 | 0.1295 | 15.5 | 0.00124 | 44.0 | 1.3 | 34.4 | 22.3 | 0.978 |
| <i>Liolaemus magellanicus</i>     | Lmag    | run | 7  | 2.17 | 0.1348 | 16.1 | 0.00134 | 43.5 | 1.1 | 33.5 | 23.2 | 0.939 |
| <i>Liolaemus zullyi</i>           | Lzu     | run | 7  | 2.42 | 0.1325 | 17.6 | 0.00145 | 43.9 | 1.6 | 34.9 | 20.9 | 0.973 |
| <i>Acarus farris</i>              | af      | fit | 6  | 4.77 | 0.0113 | 10.7 | 0.00271 | 29.9 | 0.3 | 24.6 | 12.7 | 0.979 |
| <i>Aphelinus semiflavus</i>       | as      | fit | 6  | 5.57 | 0.0093 | 16.4 | 0.00956 | 26.6 | 0.3 | 22.3 | 9.7  | 0.866 |
| <i>Aphis gossypii</i>             | ag1     | fit | 6  | 2.32 | 0.0467 | 15.1 | 0.00166 | 39.7 | 0.4 | 30.5 | 21.1 | 0.868 |
| <i>Aphis gossypii</i>             | ag2     | fit | 8  | 3.07 | 0.0402 | 16.1 | 0.00337 | 33.3 | 0.5 | 26.5 | 15.5 | 0.952 |
| <i>Aphis gossypii</i>             | ag3     | fit | 5  | 3.83 | 0.0236 | 13.0 | 0.00251 | 32.9 | 0.4 | 26.8 | 14.4 | 0.986 |
| <i>Busseola fusca</i>             | bf1     | fit | 6  | 3.42 | 0.0105 | 24.2 | 0.01162 | 33.5 | 0.3 | 28.5 | 11.3 | 0.974 |
| <i>Busseola fusca</i>             | bf2     | fit | 6  | 4.09 | 0.0076 | 19.7 | 0.00400 | 35.5 | 0.3 | 29.9 | 13.0 | 0.989 |
| <i>Cactoblastis castorum</i>      | cc      | fit | 5  | 4.65 | 0.0010 | 20.9 | 0.00503 | 35.0 | 0.1 | 29.9 | 11.8 | 0.970 |
| <i>Calandra oryzae</i>            | co      | fit | 9  | 4.27 | 0.0021 | 21.0 | 0.00531 | 34.7 | 0.1 | 29.4 | 12.1 | 0.870 |
| <i>Cotesia plutellae</i>          | cp      | fit | 6  | 4.05 | 0.0098 | 16.6 | 0.00296 | 35.0 | 0.3 | 29.2 | 13.7 | 0.984 |
| <i>Cryptolestes ferrugineus</i>   | cf      | fit | 9  | 3.79 | 0.0019 | 24.4 | 0.00353 | 41.2 | 0.1 | 35.3 | 13.7 | 0.884 |
| <i>Dactylopius austrinus</i>      | da      | fit | 7  | 5.21 | 0.0017 | 21.4 | 0.00509 | 35.4 | 0.2 | 30.6 | 11.2 | 0.996 |
| <i>Diaphorina citri</i>           | dc      | fit | 5  | 3.78 | 0.0059 | 25.5 | 0.02871 | 31.4 | 0.2 | 27.5 | 9.1  | 0.993 |
| <i>Ebcarsia bimaculata</i>        | eb      | fit | 5  | 4.10 | 0.0050 | 22.4 | 0.00597 | 35.3 | 0.2 | 30.0 | 12.0 | 0.992 |
| <i>Eretmocerus furuhashii</i>     | efu     | fit | 5  | 6.93 | 0.0010 | 21.4 | 0.00614 | 34.2 | 0.2 | 30.0 | 9.8  | 0.954 |
| <i>Gonatocerus triguttatus</i>    | gt      | fit | 5  | 4.10 | 0.0081 | 19.4 | 0.00412 | 35.0 | 0.3 | 29.4 | 12.9 | 0.932 |
| <i>Hyperaspis notata</i>          | hn1     | fit | 6  | 4.22 | 0.0027 | 19.2 | 0.00459 | 33.9 | 0.1 | 28.5 | 12.5 | 0.893 |
| <i>Hyperaspis notata</i>          | hn2     | fit | 6  | 3.42 | 0.0036 | 26.1 | 0.01627 | 34.0 | 0.1 | 29.3 | 10.6 | 0.920 |
| <i>Hypothenemus hampei</i>        | hh      | fit | 5  | 4.22 | 0.0038 | 21.6 | 0.00919 | 32.0 | 0.1 | 27.2 | 10.8 | 0.849 |
| <i>Liposcelis badia</i>           | lb      | fit | 7  | 2.39 | 0.0037 | 25.1 | 0.00993 | 35.1 | 0.0 | 28.8 | 14.4 | 0.888 |
| <i>Liposcelis decolor</i>         | ld      | fit | 8  | 2.07 | 0.0056 | 31.8 | 0.02720 | 37.9 | 0.1 | 33.1 | 13.7 | 0.961 |
| <i>Liposcelis entomophila</i>     | le      | fit | 7  | 3.65 | 0.0017 | 23.1 | 0.00527 | 36.9 | 0.1 | 31.2 | 12.9 | 0.838 |
| <i>Liposcelis paeta</i>           | lp      | fit | 7  | 3.27 | 0.0014 | 23.0 | 0.00282 | 41.8 | 0.1 | 35.2 | 15.4 | 0.915 |
| <i>Liposcelis tricolor</i>        | lt      | fit | 7  | 4.14 | 0.0006 | 25.0 | 0.00864 | 35.8 | 0.0 | 30.9 | 11.1 | 0.859 |
| <i>Liriomyza sativae</i>          | ls1     | fit | 5  | 3.66 | 0.0080 | 18.5 | 0.00366 | 35.0 | 0.2 | 29.0 | 13.9 | 0.950 |
| <i>Macrolophus pygmaeus</i>       | mp1     | fit | 5  | 3.46 | 0.0060 | 16.8 | 0.00401 | 32.6 | 0.1 | 26.5 | 14.0 | 0.999 |

|                                      |     |     |   |      |        |      |         |      |     |      |      |       |
|--------------------------------------|-----|-----|---|------|--------|------|---------|------|-----|------|------|-------|
| <i>Macrolophus pygmaeus</i>          | mp2 | fit | 5 | 2.40 | 0.0109 | 24.9 | 0.02084 | 31.8 | 0.1 | 26.8 | 12.6 | 0.998 |
| <i>Macrosiphum euphorbiae</i>        | me  | fit | 6 | 2.34 | 0.0478 | 10.8 | 0.00273 | 29.9 | 0.2 | 21.5 | 19.0 | 0.966 |
| <i>Myzus persicae</i>                | Mp2 | fit | 6 | 3.29 | 0.0508 | 11.7 | 0.00300 | 30.0 | 0.5 | 23.4 | 15.2 | 0.974 |
| <i>Myzus persicae</i>                | Mp3 | fit | 7 | 3.98 | 0.0181 | 7.0  | 0.00159 | 32.1 | 0.3 | 25.9 | 14.9 | 0.890 |
| <i>Paronychiurus kimi</i>            | pk  | fit | 5 | 5.17 | 0.0026 | 15.8 | 0.00547 | 29.3 | 0.1 | 24.5 | 11.1 | 0.968 |
| <i>Phyllonorycter corylifoliella</i> | pc  | fit | 5 | 3.21 | 0.0065 | 17.6 | 0.00350 | 34.5 | 0.1 | 28.0 | 15.0 | 0.985 |
| <i>Rhizopertha dominica</i>          | rd  | fit | 6 | 7.24 | 0.0003 | 21.0 | 0.00318 | 38.7 | 0.1 | 34.4 | 10.4 | 0.965 |
| <i>Sesamia calamistis</i>            | sc1 | fit | 6 | 3.08 | 0.0125 | 24.5 | 0.01177 | 33.8 | 0.3 | 28.5 | 11.9 | 0.822 |
| <i>Sesamia calamistis</i>            | sc2 | fit | 6 | 3.31 | 0.0115 | 23.9 | 0.00702 | 35.8 | 0.3 | 30.1 | 12.8 | 0.995 |
| <i>Sesamia nonagrioides</i>          | sn1 | fit | 6 | 2.90 | 0.0146 | 24.1 | 0.01081 | 33.7 | 0.2 | 28.1 | 12.5 | 0.882 |
| <i>Sesamia nonagrioides</i>          | sn2 | fit | 6 | 3.47 | 0.0121 | 19.4 | 0.00381 | 35.6 | 0.3 | 29.4 | 14.2 | 0.962 |
| <i>Sitobion miscanthi</i>            | sm  | fit | 5 | 4.89 | 0.0122 | 14.0 | 0.00468 | 28.7 | 0.3 | 23.7 | 11.7 | 0.999 |
| <i>Stethorus punctillum</i>          | Sp  | fit | 8 | 8.63 | 0.0006 | 16.9 | 0.00343 | 34.0 | 0.2 | 30.0 | 9.6  | 0.948 |
| <i>Thrips tabaci</i>                 | tt  | fit | 5 | 3.17 | 0.0108 | 22.4 | 0.01588 | 30.3 | 0.2 | 25.4 | 11.1 | 1.000 |
| <i>Toxoptera citricidus</i>          | tc  | fit | 7 | 3.89 | 0.0151 | 21.0 | 0.01018 | 30.9 | 0.4 | 26.0 | 11.0 | 0.895 |
| <i>Trichogramma bruni</i>            | Tb  | fit | 5 | 2.56 | 0.0201 | 25.3 | 0.01056 | 35.0 | 0.3 | 29.1 | 13.6 | 0.999 |
| <i>Trichogramma mwanzai</i>          | Tm  | fit | 5 | 2.73 | 0.0270 | 20.5 | 0.00428 | 35.8 | 0.3 | 28.8 | 15.7 | 0.962 |
| <i>Trichogramma pretiosum</i>        | tp1 | fit | 6 | 4.00 | 0.0097 | 21.5 | 0.00570 | 34.7 | 0.4 | 29.4 | 12.2 | 0.984 |
| <i>Trichogrammatoidea lutea</i>      | tl  | fit | 5 | 3.71 | 0.0100 | 26.5 | 0.01062 | 36.2 | 0.5 | 31.2 | 11.1 | 0.989 |
| <i>Trioxys utilis</i>                | tu  | fit | 6 | 8.80 | 0.0059 | 15.3 | 0.00771 | 26.7 | 0.5 | 23.0 | 8.7  | 0.974 |
| <i>Tetraneura nigriabdominalis</i>   | tn  | fit | 5 | 6.62 | 0.0029 | 12.9 | 0.00245 | 33.1 | 0.3 | 28.5 | 11.1 | 0.990 |
